# Supplementary material for: Effect of educational interventions on knowledge of the disease and glycaemic control in patients with type 2 diabetes mellitus: a systematic review and meta-analysis of randomised controlled trials
Source: PubMed Central journal article supplement — BMJ Open. 2021 Dec 9;11(12):e049806. doi: 10.1136/bmjopen-2021-049806 (PMC8663073; doi:10.1136/bmjopen-2021-049806), 2021-12-09
Supplement: bmjopen-2021-049806.draft_revisions.pdf [file bmjopen-2021-049806.draft_revisions.pdf]

# BMJ Open

BMJ Open is committed to open peer review. As part of this commitment we make the peer review history of every article we publish publicly available.

When an article is published we post the peer reviewers' comments and the authors' responses online. We also post the versions of the paper that were used during peer review. These are the versions that the peer review comments apply to.

The versions of the paper that follow are the versions that were submitted during the peer review process. They are not the versions of record or the final published versions. They should not be cited or distributed as the published version of this manuscript.

BMJ Open is an open access journal and the full, final, typeset and author-corrected version of record of the manuscript is available on our site with no access controls, subscription charges or pay-per-view fees (<http://bmjopen.bmj.com>).

If you have any questions on BMJ Open's open peer review process please email [info.bmjopen@bmj.com](mailto:info.bmjopen@bmj.com)

# BMJ Open

## The effect of educational interventions on knowledge of the disease and glycemic control in patients with type 2 diabetes mellitus: a systematic review and meta-analysis of randomized controlled trials

|                               |                                                                                                                                                                                                                                                                                                                                                |
|-------------------------------|------------------------------------------------------------------------------------------------------------------------------------------------------------------------------------------------------------------------------------------------------------------------------------------------------------------------------------------------|
| Journal:                      | <i>BMJ Open</i>                                                                                                                                                                                                                                                                                                                                |
| Manuscript ID                 | bmjopen-2021-049806                                                                                                                                                                                                                                                                                                                            |
| Article Type:                 | Original research                                                                                                                                                                                                                                                                                                                              |
| Date Submitted by the Author: | 02-Feb-2021                                                                                                                                                                                                                                                                                                                                    |
| Complete List of Authors:     | shiferaw, wondimeneh; Debre Berhan University, Yirga, Tadesse; Debre Markos University Desta, Melaku; Debre Markos University, Midwifery; Debre Markos University, Midwifery<br>Kassie, Ayelign; Woldia University, Nursing; Petrucka, Pammla; University of Saskatchewan, aynalem, yared; Debre Berhan University, pediatric and child health |
| Keywords:                     | EDUCATION & TRAINING (see Medical Education & Training), Diabetes & endocrinology < INTERNAL MEDICINE, General diabetes < DIABETES & ENDOCRINOLOGY                                                                                                                                                                                             |
|                               |                                                                                                                                                                                                                                                                                                                                                |

SCHOLARONE™  
Manuscripts

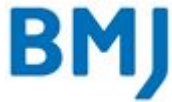

I, the Submitting Author has the right to grant and does grant on behalf of all authors of the Work (as defined in the below author licence), an exclusive licence and/or a non-exclusive licence for contributions from authors who are: i) UK Crown employees; ii) where BMJ has agreed a CC-BY licence shall apply, and/or iii) in accordance with the terms applicable for US Federal Government officers or employees acting as part of their official duties; on a worldwide, perpetual, irrevocable, royalty-free basis to BMJ Publishing Group Ltd ("BMJ") its licensees and where the relevant Journal is co-owned by BMJ to the co-owners of the Journal, to publish the Work in this journal and any other BMJ products and to exploit all rights, as set out in our [licence](#).

The Submitting Author accepts and understands that any supply made under these terms is made by BMJ to the Submitting Author unless you are acting as an employee on behalf of your employer or a postgraduate student of an affiliated institution which is paying any applicable article publishing charge ("APC") for Open Access articles. Where the Submitting Author wishes to make the Work available on an Open Access basis (and intends to pay the relevant APC), the terms of reuse of such Open Access shall be governed by a Creative Commons licence – details of these licences and which [Creative Commons](#) licence will apply to this Work are set out in our licence referred to above.

Other than as permitted in any relevant BMJ Author's Self Archiving Policies, I confirm this Work has not been accepted for publication elsewhere, is not being considered for publication elsewhere and does not duplicate material already published. I confirm all authors consent to publication of this Work and authorise the granting of this licence.

1  
2  
3 **The effect of educational interventions on knowledge of the disease and glycemc control in**  
4 **patients with type 2 diabetes mellitus: a systematic review and meta-analysis of randomized**  
5 **controlled trials**  
6  
7

8  
9 Wondimeneh Shibabaw Shiferaw<sup>1\*</sup>, Tadesse Yirga Akalu<sup>2</sup>, Melaku Desta<sup>3</sup>, Ayelign Mengesha  
10 Kassie<sup>4</sup>, Pammla Margaret Petrucka<sup>5</sup>, Yared Asmare Aynalem<sup>1</sup>  
11  
12

13  
14 <sup>1</sup>Department of Nursing, College of Health Science, Debre Berhan University, Ethiopia  
15

16  
17 <sup>2</sup>Department of Nursing, College of Health Science, Debre Markos University, Ethiopia  
18

19  
20 <sup>3</sup>Department of Midwifery, College of Health Science, Debre Markos University  
21

22  
23 <sup>4</sup>Department of Nursing, College of Health Science, Woldia University, Ethiopia  
24

25  
26 <sup>5</sup>College of Nursing, University of Saskatchewan, Canada; Academics without Borders  
27

28 **\*Corresponding author**

29 Wondimeneh Shibabaw Shiferaw

30 Address: P.O. Box 445, Debre Berhan University, Ethiopia

31 Email: [wshibabaw2015@gmail.com](mailto:wshibabaw2015@gmail.com)  
32  
33  
34  
35  
36  
37  
38  
39  
40  
41  
42  
43  
44  
45  
46  
47  
48  
49  
50  
51  
52  
53  
54  
55  
56  
57  
58  
59  
60

## Abstract

**Background and aims:** Globally, type 2 diabetes has become increasing which accounting for over 90% of all diabetes cases. Though the magnitude of uncontrolled glycemetic levels in patients with Type 2 diabetes is steadily rising, evidence showed that effectively controlled glycemetic levels can prevent complications and improve the quality of life of patients. As little is known about the effect of educational intervention on this population, this systematic review and meta-analysis evaluated the effectiveness of educational interventions on glycemetic control and disease knowledge among Type 2 diabetes patients.

**Methods:** PubMed, Google Scholar, Cochrane Library, Scopus, African Journals Online, and Wiley Online Library were searched. The Cochrane Collaboration tool was used to evaluate risk of bias of among eligible studies. A random-effects model was employed to estimate combined effect sizes. Subgroup analyses were employed to investigate possible sources of heterogeneity between studies. The overall certainty of the evidence was evaluated using the Grading of Recommendations Assessment, Development, and Evaluation (GRADE) approach.

**Results:** A total of 19 trials with 2,708 study participants included in the review. Primary outcomes (glycemetic control) were reported in eighteen trials. The pooled estimated impact of educational intervention on glycemetic levels using the random effect model was -0.83 (95% CI: -1.17, -0.49,  $p < 0.001$ ). Subgroup analyses revealed greater A1C reductions in those studies with intervention durations of up to three months and with empirical intervention designs. Educational interventions led to significant increases in participants' knowledge of type 2 diabetes (SMD: 1.16; 95% CI: 0.71, 1.60;  $I^2 = 93\%$ ).

**Conclusion:** In the current review overall, educational interventions can potentially lead to improved glycemetic control levels in patients with Type 2 diabetes despite heterogeneity across the studies. Besides, the findings showed that educational interventions could increase disease knowledge among Type 2 diabetes patients.

**Keywords:** educational intervention, Type 2 diabetes, diabetes knowledge, glycemetic control

## Strengths and limitations of this study

- This systematic review will provide a comprehensive search of the literature the effect of educational intervention on glyceimic control and knowledge of type 2 diabetes.
- An extensive search of multiple databases (i.e, PubMed, African Journals online, Web of Science, Scopus, and Google scholar) were performed to ensure a comprehensive review, nevertheless, potentially relevant articles from other/additional databases may be missed.
- We only used English language articles although our target was the worldwide which could be in several other languages such as Spanish, French, or Portuguese.
- It may be lacked global representativeness because no data were found from all countries of the globe.

## Background

Diabetes mellitus (DM) is increasingly becoming an extensive non-communicable health problem, leading to significant morbidity and mortality [1]. Globally, a recent estimate showed that approximately 422 million adults living with DM [2]. According to International Diabetes Federation (IDF) projection approximately 629 million peoples will be affected by 2045 [3]. Of these, approximately 80% of affected individuals live in low-income countries [4]. In particular, Type 2 diabetes (T2DM) is responsible for more than 90% of all diabetes cases [5]. The increasing burden is due to several risk factors such as sedentary behaviors, obesity, unhealthy diet, lack of exercise, family history, and age [6-8].

Maintaining optimal glyceimic levels is vital to diabetes control [9]. However, evidence showed that poor glyceimic control ( $HbA1c \geq 7\%$ ) has contributes to kidney failure, myocardial infarction, stroke, retinopathy, hypertension, increasing costs for patient care, and reduced quality of life [10-14]. The aims of T2DM management are to attain glyceimic targets, minimize adverse events, and prevent complications [15, 16]. Therefore, lifestyle modification such as diet and exercise have been reported to reduce the complication of uncontrolled glyceimic levels in T2DM patients [17].

Evidence has revealed that self-management education can reduce the glyceimic level by 30–80% [18]. Besides, diabetes education can improve glyceimic control, changing people's behaviors,

1  
2  
3 promoting self-care, reducing complications, and progression of the disease [19-21]. Moreover,  
4 numerous studies suggest that diabetes educational interventions can increase knowledge of  
5 diabetes [22, 23], medication compliance [24], and improve glycemc control [25, 26].  
6  
7

8  
9 Though knowledge about diabetes has paramount benefit to patients' self-care management;  
10 insufficient diabetes knowledge is unfavorable to the patients' health due to most of the  
11 complications that arise can be prevented through self-care practice [27, 28]. Besides, inadequate  
12 knowledge of diabetes is responsible for poor self-care practice and uncontrolled glycemc levels  
13 [29]. However, numerous studies have shown that improving patient knowledge about T2DM  
14 and its complications has substantial benefits to maintain optimal glycemc levels, enhance  
15 treatment adherence, reduces treatment cost, and decreases the progression of disease [30-32].  
16 Previously several review on the effect of self-management interventions for patients with  
17 T2DM have been employed [33-35]. However, most review has been included inadequate  
18 number of articles, not address the effect of education on knowledge of diabetes, and  
19 interventions were poorly described. Thus, research is required to estimate the effect of  
20 educational interventions with sufficient methodological quality and substantive statistical  
21 analysis. Hence, the present review and meta-analysis aimed to evaluate the effect of educational  
22 interventions on glycemc control and disease knowledge in patients with T2DM.  
23  
24  
25  
26  
27  
28  
29  
30  
31  
32

### 33 34 **Review questions**

- 35  
36  Does a structured educational intervention increase diabetes knowledge in patients with  
37 T2DM?  
38  
39  Does a structured diabetic educational intervention reduce HbA1c levels among T2DM  
40 patients?  
41  
42  
43

### 44 **Methods**

#### 45 **Protocol and registration**

46  
47 Initially, PROSPERO was searched to confirm for other reviews on the effect of educational  
48 interventions on glycemc control and disease knowledge among patients with T2DM. But, no  
49 such reviews were identified. Then, the protocol was registered on Prospero  
50 ([www.crd.york.ac.uk/PROSPERO/](http://www.crd.york.ac.uk/PROSPERO/)) as recommended by the PRISMA statement [36] with the  
51 number (CRD42020205838).  
52  
53  
54  
55  
56  
57

## Search strategy and data sources

We did a compressive systematic search to collect all relevant articles using the Peer Review of Electronic Search Strategies (PRESS) for systematic reviews [37]. The search was limited to studies published in peer-reviewed journals from January 2000 to July 2020 (as authors are interested in up-to-date data). The Preferred Reporting Items for Systematic Review and Meta-Analysis (PRISMA) guidelines were used to conduct and report the present review [36]. The literature was searched from PubMed, Scopus, Google Scholar, African Journals Online, Cochrane Library, and Wiley Online Library. The keywords used for the review included “educational”, “behavioral”, “knowledge”, “glycemic control”, “glycosylated hemoglobin”, “HbA1c”, “type 2 diabetes mellitus”, “type 2 diabetes”, and “T2DM”. Boolean operators like “AND” and “OR” were wont to combine search terms. The MeSH terms employed in the PubMed search engine in various combinations are shown in Table 1. To access all articles on this study goal, it was decided to manually review all references to reduce publication bias. Searches were performed in August 2020. The search was restricted to full texts, human studies, and English language publications. In the present review, the Patient/Population (P); Intervention (I); Comparison (C); and Outcomes (O) question was as follows: are educational intervention (I) in type 2 diabetes people (P), when compared to people who had not taken part in the educational intervention or had standard care (C), associated with improved glycemic control and disease knowledge (O)?.

**Table 1. PubMed search history**

| Search | Search terms                                                                                                | Hits      |
|--------|-------------------------------------------------------------------------------------------------------------|-----------|
| #1     | Type 2 diabetes[tw] OR Type 2 diabetes mellitus[tw] OR T2DM[tw] OR insulin non dependent diabetes [tw]      | 183,620   |
| #2     | Education [tw] OR intervention [tw] OR behavioral intervention[tw] OR self-management [tw]                  | 1,473,053 |
| #3     | Glycemic control [tw] OR glycosylated hemoglobin[tw] OR HbA1c[tw]                                           | 59,352    |
| #4     | Knowledge [tw] OR behavioral outcomes[tw]                                                                   | 775,760   |
| #5     | #1 AND #2 AND #3 AND #4                                                                                     | 4,888     |
| #6     | #5; Limits: studies done with Humans, English language, full text, RCT, and publication year (2000 to 2020) | 447       |

## Eligibility criteria



## Types of Participants

This review takes into consideration studies that included adult patients ( $\geq 18$  years old) with T2DM in outpatient health settings, primary care settings, diabetic clinics, and hospitals within the catchment. Children or those with T1DM were excluded from the review.

## Types of Interventions

The review considered an educational intervention as intervention provided to adult patients with T2DM in diabetic care settings receiving standard or routine care. Intervention could be provided by any health care provider, involved any medium (written, oral, video, and computer), at the individual or group-level, theory-based or empirical, and we did not impose to restrict the duration of intervention. Studies lacking an education intervention, unclear information respecting to the intervention, and insufficient data on the main outcome variable were considered criteria for exclusion.

**The comparator** in this study was the delivery of the usual care/routine care for T2DM. Routine care refers to diabetes care that health care staff usually and normally provides in their daily care. Articles were excluded if they did not implement a comparison with routine care.

## Types of Studies

In the present review studies were included if they were randomized controlled trials. Full text articles were included, whereas studies published with only abstract or unpublished data were excluded. Besides, nonrandomized controlled trials, quasi-experimental, before and after, cohort, case-control, and cross-sectional studies were excluded because uncontrolled trials and observational studies leads to a greater risk of biased estimates of effect size [38].

## Type of outcome

This review included the following outcome measures: glycemic control as the primary outcome of the meta-analysis, and knowledge of diabetes considered as the secondary outcome. The study was excluded if outcomes were not measured or data could not be extracted.

## Study selection

1  
2  
3 After database exploration, all recognized studies were uploaded into EndNote version 8, and  
4 duplicates articles were removed. Clinical trials studies were included for this systematic review.  
5 Predefined selection criteria were used to select relevant full-text articles during the screening  
6 process. Two authors (WSS & YAA) independently screened the title, abstract, and keywords of  
7 the studies identified for possible eligibility in the review. Afterward, all full-text articles were  
8 evaluated carefully for inclusion and data extraction. Further screening of full text was done by  
9 two (TYA & YAA) independent authors to select the studies which satisfied the eligibility  
10 standards. The possible justification for the exclusion of full-text studies was documented and  
11 reported in the systematic review. Any uncertainties about study eligibility were discussed  
12 between authors.  
13  
14  
15  
16  
17  
18  
19  
20  
21  
22

### 23 **Data extraction**

24 After identifying studies for eligibility, data abstraction was conducted by two (AMK & WSS)  
25 independently authors using Microsoft™ Excel for Windows. The first author made the data  
26 abstraction, whereas the second author control the quality of extracted and entered data. The data  
27 extracted from each study included first/corresponding author, year of publication, study setting,  
28 education provider, duration of intervention, the intensity of intervention, components of the  
29 intervention, number of participants in each arm (intervention and standard care group),  
30 intervention design, outcome measures, before and after intervention HBA1c levels and  
31 knowledge scores. The outcome measures in this review were reported as the variation from  
32 starting point to closing date of follow-up in the intervention and standard care groups. If the  
33 standard deviation (SD) of mean difference was not reported in each included study, the values  
34 were recalculated according to the guideline in the Cochrane Handbook [39].  
35  
36  
37  
38  
39  
40  
41  
42  
43

### 44 **Assessment of risk of bias in included studies**

45 Two (MD & PMP) independently authors assessed within trial risk of bias in each included study  
46 using Cochrane's Risk of Bias assessment tool [40]. The Cochrane's Risk of Bias tool has seven  
47 evaluation domains that are used to evaluate validity and bias in studies of clinical trials in (1)  
48 random sequence generation, (2) allocation concealment, (3) blinding of participants and  
49 personnel, (4) blinding of outcome assessor, (5) incomplete outcomes reporting, (6) the  
50 selectivity of outcome reporting, and (7) other possible sources of bias. For this review, the risk  
51  
52  
53  
54  
55  
56  
57

1  
2  
3 of bias item was rated as “low risk” if it had been unlikely that a bias would significantly change  
4 the results; “unclear” if it had been likely that a bias would raise some uncertainty about the  
5 results; or “high risk” if it had been likely that a bias would seriously change the results. Any  
6 disagreement was resolved through discussion and consensus.  
7  
8  
9

### 10 **Assessment of certainty of the evidence**

11  
12 To evaluate the quality of the evidence, the authors used the Grading of Recommendations  
13 Assessment, Development, and Evaluation (GRADE) approach[41]. GRADE pro-GDT was  
14 employed to summarize the quality of evidence [42]. The certainty of the evidence encompasses  
15 consideration of the within-study risk of bias which comprising methodological worth,  
16 indirectness of evidence, unexplained heterogeneity, imprecision, and the probability of  
17 publication bias. The GRADE approach has four levels of quality such as high-quality evidence  
18 recommends that additional study is very unlikely to change our confidence in the estimate of  
19 effect size; moderate-quality reflects further research as likely to have a vital impact on the  
20 estimate of effect size and may alter the estimate; low quality reveals that further research is  
21 very unlikely to have a significant influence on the current estimate of effect size and is likely to  
22 change the estimate; and very low quality suggests one is precise indeterminate about the  
23 estimate.  
24  
25  
26  
27  
28  
29  
30  
31  
32  
33

### 34 **Data synthesis and analysis**

35  
36 The primary and secondary outcomes were reported as mean difference (MD) and standardized  
37 mean difference (SMD) with a 95% confidence interval (CI), using a random-effects model [43]  
38 respectively. Degree heterogeneity was examined with the  $I^2$  statistic, which expresses the  
39 amount of heterogeneity between studies [44]. To interpreting the effect sizes, authors followed  
40 Cohen's guidelines where  $d \leq 0.2$  was small,  $d \approx 0.5$  was medium, and  $d > 0.8$  was large  
41 variation among intervention and control groups [45]. We performed subgroup analyses to  
42 reduced the level of heterogeneity for the primary outcomes using duration of intervention and  
43 intervention design. Publication bias was visually evaluated using the funnel plot, supplemented  
44 by Egger's regression test [46, 47]. Sensitivity analysis was performed due to high degree  
45 heterogeneity and risk of bias. Review Manager of the Cochrane Collaboration (RevMan 5.4,  
46 Cochrane Organization) was used to perform the meta-analysis.  
47  
48  
49  
50  
51  
52  
53  
54  
55  
56  
57

## Patient and public involvement

Patients and/or the public were not involved in the design, or conduct, or reporting, or dissemination plans of this research.

## Results

### Selection of studies

The search of the six databases yielded 1, 134 articles, and 4 articles were retrieved manually through a review of reference lists. After eliminating duplicates, 457 articles remained. Three hundred seventy-two studies were removed after reading the abstract and title, leaving 85 full articles for full screening. Following 66 exclusions at the full-text level (mainly due to nonrandomized control trials (n = 34), or reporting mixed population (Type 1 and Type 2 diabetes) (N= 7)) 19 studies were incorporated in the final review. The flow diagram for study selection is shown in Figure 1.

### Characteristics of the included studies

In the current meta-analysis a total of 19 articles met the inclusion criteria with 2,708 study participants. Of these 9 included articles have reported glycemic control and knowledge of diabetes as a common outcome variable. Regarding location, two were from Brazil [48, 49], three from China [50-52], two from Germany [53, 54], five from Iran [55-59], two from Malaysia [60, 61], two from Sweden [62, 63], and one each from Thailand [64], Sri Lanka [65], and Australia [66]. The sample size varied from 60 [50] to 300 participants [52]. Educational interventions in the review was guided by the following theories or models; three studies used the theory of self-efficacy [51, 60, 64], three studies [53, 58, 63] used empowerment theory, two studies [57, 65] used theory of self- efficacy and motivational interviewing, each one study used chronic care model [52], Precede-Proceed model [59], BASNEF Model [56], and behavioral theory [61]. However, the remainder of the articles [48-50, 54, 55, 62, 66] used non-theory or model based approaches.

1  
2  
3 The approach of providing educational interventions comprises of face-to-face counseling [51,  
4 52, 60, 65, 66], diabetes education sessions [48, 49, 52, 57, 60, 64], group discussion [53, 55-57,  
5 64], telephone follow-up [51, 57, 60, 64, 66], home visit [64], demonstration [50, 51, 56],  
6 question and response [55, 56] were among the most common. The control groups of all studies  
7 had the current standard of care. The duration of educational interventions varied from 4 weeks  
8 [51, 55, 56] to 12 months [49, 63]. Interventionl groups were obtained the information by  
9 different health care proffessionals such as physicians [51, 52, 63], nurses [49, 53, 55, 64, 66],  
10 nutritionist [58, 61], health manager [52], public health assistant [52], and pharmacists [48]. In  
11 most of the included studies, intervention processes were group based education [49, 51-60, 62-  
12 64], combined education [50, 65, 66]; however, in the rest of the studies, web-based [61], and  
13 individual-based [48] education approaches were used. The main results and the features of the  
14 selected studies are presented in Table1.  
15  
16  
17  
18  
19  
20  
21  
22  
23  
24  
25  
26  
27  
28  
29  
30  
31  
32  
33  
34  
35  
36  
37  
38  
39  
40  
41  
42  
43  
44  
45  
46  
47  
48  
49  
50  
51  
52  
53  
54  
55  
56  
57  
58  
59  
60

Table 2. Characteristics of the included studies

| Authors            | Country   | No of subjects (baseline) | Health education provider | Theory/model used | Group/individual | Intervention                                                                                                                                                  | Components of intervention                                                                                                                                                                                                                                                   | Duration of intervention | Outcome measures                             | Outcome indicators |
|--------------------|-----------|---------------------------|---------------------------|-------------------|------------------|---------------------------------------------------------------------------------------------------------------------------------------------------------------|------------------------------------------------------------------------------------------------------------------------------------------------------------------------------------------------------------------------------------------------------------------------------|--------------------------|----------------------------------------------|--------------------|
| Wichit et al [64]  | Thailand  | I=70<br>C=70              | Trained Nurse             | Self-efficacy     | Group            | Education classes (3 session), discussions, a home visit, and a telephone follow-up                                                                           | Program focus on; meal planning, foot hygiene, physical activities, problem solving, diabetes-related complications, enhancing competence, and diabetes knowledge                                                                                                            | 9 week                   | at baseline, week 5, and week 13             | ①②<br>④⑤<br>⑥      |
| Fan et al, [66]    | Australia | I=138<br>C=138            | Trained Nurse             | Empirical         | Mixed            | Face-to-face counseling over 1 h, and self-care plan, a 10-min telephone before the appointment, attend a 3-monthly forum about 2 h.                          | Education emphasizes on such as diet modification, exercise, SMBG, psychological and adherence to medication                                                                                                                                                                 | 6 months                 | At each follow-up and the end of the 6-month | ①                  |
| Grillo et al, [49] | Brazil    | I=68<br>C=68              | Trained generalist nurse  | Empirical         | Group            | Structured diabetes self-management education, the course consisted of weekly 2-hour meetings for 5 weeks, reinforcement meetings every 4 months (7 sessions) | The course content included (1) identification of modifiable risk factors for type 2 diabetes mellitus, (2) non-pharmacological treatment, emphasizing diet and exercise, (3) pharmacological therapy, (4) an overview of chronic diabetes complications, and (5) foot care. | 12 months                | At baseline, 4, 8, and 12 months             | ①④                 |
| Cani et al, [48]   | Brazil    | I= 37<br>C= 41            | Pharmacist                | Empirical         | Individual       | Diabetes education (5 sessions), pharmacotherapeutic care plan, and written guidance                                                                          | Education on acute and chronic complications, the importance of lifestyle changes, foot care, the importance of home blood glucose monitoring and other topics, advice focused on the indication, proper dosage, side effects and adequate storage of medication,            | 6-month                  | At baseline and 6 months                     | ①③<br>④⑥           |
| Zheng et al, [50]  | China     | I=30<br>C=30              | Therapist guidance        | Empirical         | Mixed            | Two-session diabetes self-management education which is theory and practical course, lecture, video, exercise, food simulation model, and vivid models        | Theory course focuses on knowledge of diabetes and self-management strategies, such as diet guidance, exercise guidance, and knowledge of hypoglycemia treatment, foot care, medication, and blood glucose                                                                   | 3 months                 | At baseline and 3 months                     | ①③<br>⑤            |

1  
2  
3  
4  
5  
6  
7  
8  
9  
10  
11  
12  
13  
14  
15  
16  
17  
18  
19  
20  
21  
22  
23  
24  
25  
26  
27  
28  
29  
30  
31  
32  
33  
34  
35  
36  
37  
38  
39  
40  
41  
42  
43  
44  
45  
46  
47

|                       |         |                |                                                        |                                      |       |                                                                                                                                                                                                                |                                                                                                                                                                                                                  |          |                                                              |                |
|-----------------------|---------|----------------|--------------------------------------------------------|--------------------------------------|-------|----------------------------------------------------------------------------------------------------------------------------------------------------------------------------------------------------------------|------------------------------------------------------------------------------------------------------------------------------------------------------------------------------------------------------------------|----------|--------------------------------------------------------------|----------------|
|                       |         |                |                                                        |                                      |       |                                                                                                                                                                                                                | monitoring. The practice course focus on one-on-one nutrition guidance and individualized exercise guidance.                                                                                                     |          |                                                              |                |
| Jiang et al, [51]     | China   | I=133<br>C=132 | Trained nurses and physicians                          | Self-efficacy                        | Group | Structured education program, patients' experience sharing, peer modeling, demonstration, the intervention was given four weekly sessions for 1 month and then face-to-face/telephone meetings every 3 months. | diabetes-related knowledge and diabetes self-management skills based on self-efficacy theory.                                                                                                                    | 4 weeks  | At baseline, 3- and 6-month                                  | ①②<br>③④<br>⑤  |
| Kong et al, [52]      | China   | I=150<br>C=150 | Physician, health manager, and public health assistant | Chronic Care Model                   | Group | Pamphlets and face-to-face communication, continuous medical education, education was 9 session every month.                                                                                                   | received the five components CCM (chronic care model)-based intervention, awareness of the chronic disease management, Self-management support included goals setting, planning, doing, checking, and assessing, | 9 months | At baseline, & 9 months                                      | ①③<br>⑥        |
| Braunet al, [54]      | Germany | I=83<br>C=72   | Not stated                                             | Empirical                            | Group | Diabetes teaching and treatment program, seven educational classes of 45 min duration,                                                                                                                         | Self-monitoring, Diabetes treatment,                                                                                                                                                                             | 6 months | Before (t0), immediately after (t1), and 6 months after (t2) | ①④<br>⑤        |
| Hermanns et al [53]   | Germany | I=92<br>C=92   | Certified diabetes nurse                               | Empowerment self-management approach | Group | Lecture, discussion, and a nutrition game, the education is given for 10 lessons of 90 min each, 5-week period, two sessions per week.                                                                         | Lifestyle modification, blood glucose self-monitoring, metabolic risk factors, individual goals of diabetes treatment, Nutrition game, Physical exercise, and complications                                      | 5-weeks  | At baseline, and 6 months after the intervention             | ①②<br>③④<br>⑤⑥ |
| Didarloo A et al [55] | Iran    | I=45<br>C=45   | Trained nurse                                          | Empirical                            | Group | Interactive approach such as discussion, brainstorming, question and response techniques for 60 min/week for 4 weeks, utilized                                                                                 | Promoting self-efficacy of diabetics, the educator utilized specific training approaches such as verbal persuasion, modeling,                                                                                    | 4 weeks  | At baseline, and 3 months                                    | ①②<br>③④<br>⑥  |

1  
2  
3  
4  
5  
6  
7  
8  
9  
10  
11  
12  
13  
14  
15  
16  
17  
18  
19  
20  
21  
22  
23  
24  
25  
26  
27  
28  
29  
30  
31  
32  
33  
34  
35  
36  
37  
38  
39  
40  
41  
42  
43  
44  
45  
46  
47

|                         |          |              |                                                  |                                             |       |                                                                                                                                                                                         |                                                                                                                                                                                              |          |                                                              |               |
|-------------------------|----------|--------------|--------------------------------------------------|---------------------------------------------|-------|-----------------------------------------------------------------------------------------------------------------------------------------------------------------------------------------|----------------------------------------------------------------------------------------------------------------------------------------------------------------------------------------------|----------|--------------------------------------------------------------|---------------|
|                         |          |              |                                                  |                                             |       | specific training such as verbal persuasion, and modeling                                                                                                                               | and performance accomplishments. Definition, signs, symptoms, and consequences of T2DM, and diet                                                                                             |          | after the end of the intervention                            |               |
| Askari[56]              | Iran     | I=54<br>C=54 | Researcher                                       | BASNEF Model                                | Group | Training in eight sessions (two sessions in a week); each session lasted for 70 min, question and answer, exercise, discussion, image, and messages were sent to the patients each week | Presented content was about diabetes, sign & symptoms, diet, food composition tables, partitioning, proper use of fruits, vegetables, and grains as sources of dietary fiber.                | 4 week   | At baseline, and 3 months after the end of the intervention. | ①②<br>③④<br>⑤ |
| Ebrahimi et al [58]     | Iran     | I=53<br>C=53 | Nurse with the endocrinologist, and nutritionist | Empowerment model                           | Group | Education training, 5–7 weekly regular meetings were held about 60–90 min.                                                                                                              | The content of education was diet, exercise, medication, and foot care. The structural model was perceived threat, self-efficacy, and evaluation                                             | 8 weeks  | Baseline, and 3 months after the end of the intervention     | ①             |
| Nejhaddadgar et al [59] | Iran     | I=43<br>C=43 | Trained professional                             | Precede-proceed model                       | Group | The education program with eight weekly sessions, training workshops were also conducted among patients' families and health workers.                                                   | Education based on the variables of the PRECEDE Model such as predisposing factors are genetic and environmental factors such as knowledge, attitudes, and self-efficacy                     | 8 weeks  | Baseline and 6 months after the education program            | ②③<br>④⑤      |
| Azami et al, [57]       | Iran     | I=71<br>C=71 | Trained nurse                                    | Self-efficacy and Motivational Interviewing | Group | Usual care plus a 12-week nurse-led diabetes self-management education, booklet, watching movie clips, group-based educational session, Telephone follow-up Calls                       | Self-care behaviors, including healthy eating, being active, monitoring, taking medication, problem solving, reducing risk, and healthy coping, are the core components of the intervention. | 12 weeks | At baseline and 12-week and 24-week post-randomization       | ①②<br>⑤⑥      |
| Tan et al, [60]         | Malaysia | I=82<br>C=82 | Not stated                                       | Self-efficacy                               | Group | Structured education consisted of monthly sessions for 3 months                                                                                                                         | The first session, healthy eating, being active, medication adherence and                                                                                                                    | 3 months | At baseline,                                                 | ①②<br>④       |



1  
2  
3  
4  
5  
6  
7  
8  
9  
10  
11  
12  
13  
14  
15  
16  
17  
18  
19  
20  
21  
22  
23  
24  
25  
26  
27  
28  
29  
30  
31  
32  
33  
34  
35  
36  
37  
38  
39  
40  
41  
42  
43  
44  
45  
46  
47

|                        |           |               |                                               |                                             |           |                                                                                                                                                                    |                                                                                                                                                                                                                                                                                                |           |                                                                |          |
|------------------------|-----------|---------------|-----------------------------------------------|---------------------------------------------|-----------|--------------------------------------------------------------------------------------------------------------------------------------------------------------------|------------------------------------------------------------------------------------------------------------------------------------------------------------------------------------------------------------------------------------------------------------------------------------------------|-----------|----------------------------------------------------------------|----------|
|                        |           |               |                                               |                                             |           | about 30 min each session, two were face-to-face individual education sessions and one was a telephone follow-up, Printed educational materials                    | Self-monitoring of blood glucose. 2 <sup>nd</sup> and 3 <sup>rd</sup> session on problem-solving skills related to hyperglycemia, hypoglycemia, sick day, and emotional episodes                                                                                                               |           | and 12 weeks                                                   |          |
| Ramadas [61]           | Malaysia  | I=66<br>C=62  | Nutritionist                                  | Behavioral theory                           | Web-based | Web-based dietary intervention, 12 lesson plans were made available to the patients one after another for 6 months with updates every fortnight                    | The dietary lesson plans in the intervention package were personalized according to the patients' dietary stages of change and were expected to improve their diabetes, knowledge, Attitude, and behavior, the participants also send their queries to the study nutritionist via the website. | 6-months  | At baseline, 6-month post-intervention and 12-months follow-up | ①②<br>③④ |
| Adolfsson, [63]        | Sweden    | I=50<br>C=51  | Nurse and physician                           | Empowerment                                 | Group     | Empowerment group education, counseling using videotaping, presentation and discussion, one follow-up session has given within 7 months.                           | About the disease, treatment, prevention of complications, blood glucose monitoring, diet, physical activity, and daily foot care.                                                                                                                                                             | 12 months | at baseline and at 1-year follow-up                            | ①②<br>④⑥ |
| Hörnsten, [62]         | Sweden    | I=44<br>C= 60 | Nurse with special education in diabetes care | Empirical                                   | Group     | Education and group discussion with ten two hour group sessions over 9 months                                                                                      | Patients' understanding of the illness.                                                                                                                                                                                                                                                        | 9 months  | Before and each year after the intervention                    | ①        |
| Jayasuriya et al, [65] | Sri Lanka | I=43<br>C=42  | Medical officer and trained nurse             | Self-efficacy and motivational interviewing | Mixed     | Self-management education through face to face meeting and lecturing, The first four sessions within six weeks, following monthly (4 weekly) for five more visits. | Physical activity and healthy Dietary intake and more recently in "avoidance behaviors" to reduce unhealthy eating                                                                                                                                                                             | 6 months  | At baseline and at 6 months                                    | ①②<br>⑤  |

Notes: Outcome indicators: ①metabolic controls, ②self-efficacy, ③behavior, ④knowledge, ⑤other psychological indicators, and ⑥quality of life.

### **Risk of bias in the included studies**

The random sequence generation for allocation was evaluated as low risk of bias in 12 studies [49-51, 53, 54, 57, 58, 60, 61, 63-65] and the rest 7 studies were measured as unclear risk of bias [48, 52, 55, 56, 59, 62, 66]. Allocation concealment was a low risk of bias in five studies [50, 51, 55, 57, 64]. On the other hand, a high risk of allocation bias was reported in one study [56]. The remaining other studies [48, 49, 52-54, 58-63, 65, 66] were evaluated to have an unclear risk of bias. Blinding of participants and educators was considered a problem in such interventions; however, one study blinded participants and educators [57]. Outcome assessors were blinded in three studies [49, 58, 64]. Regarding incomplete outcome data reporting seven studies [48, 49, 51, 55, 57, 64, 66] were evaluated as low risk of bias. The risk of bias due to selective reporting was confirmed low for 16 studies [48, 50-60, 62, 64-66], however, unclear risk of bias in three studies [49, 61, 63]. Nine studies [49-51, 53, 57, 61, 63, 64, 66] were evaluated as low risk of other potential biases, two studies [55, 62] were confirmed to be high risk for bias, and eight studies [48, 52, 54, 57-60, 65] were evaluated to have unclear risks of bias. The risk of bias for studies overall is summarized in Figure 2 and the risk of bias in each study is reported in Figure 3.

### **Effect of educational intervention on glycemic control**

The effects of educational interventions on glycemic (HbA1C) level reduction are presented in Figure 4. The results of the meta-analysis revealed that educational interventions significantly decreased HbA1c levels (MD: -0.83%; 95% CI: -1.17, -0.49;  $P < 0.001$ ) compared to standard care groups. A random-effect model was used due to significant heterogeneity ( $I^2=88\%$ ). A sensitivity analysis was employed by omitting three studies [50, 53, 55] because of a high risk of heterogeneity. When these studies were omitted, the results demonstrated that the pooled effect on HbA1c reduction remained statistically significant with an MD of -0.70% (95% CI: -0.96%, -0.44%,  $p = 0.001$ ). The  $I^2$  statistics among the studies was 73%, indicating a moderate risk of heterogeneity.

### Subgroup analysis

In the present review subgroup analysis was conducted based on the duration of intervention and intervention design (theory-based versus empirical approach) to explore the potential source of heterogeneity between trials. The results of the subgroup analysis showed that the greater effect size was reported in studies with an intervention duration of  $\leq 3$  months (MD: -1.09, 95% CI: -1.60, -0.57,  $p < 0.00$ ) with a significant evidence of heterogeneity among studies ( $I^2 = 88\%$ ) (Fig. 5). Additionally, the results of the subgroup analysis revealed that interventions with an empirical approach had greater effects in terms of reducing glycemic levels (MD: -1.03, 95% CI: -1.90, -0.15,  $p < 0.00$ ). Because of a significant degree of heterogeneity between studies ( $I^2 = 88\%$ ) random effect analysis was used (Fig. 6).

### The effect of educational interventions on diabetes knowledge

Ten out of the 19 studies were reported knowledge of diabetes as outcome variable [48, 49, 51, 53-56, 59, 61, 64]. The pooled effect size of the ten trials demonstrated an improvement in knowledge of T2DM (SMD: 1.16, 95% CI: 0.7, 1.60,  $p < 0.001$ ; Fig.7) compared to standard care groups. A random-effect model was used because of significant heterogeneity. The Dietary Knowledge Questionnaire [61] and the Diabetes and Medication Knowledge Questionnaire [49, 51, 54, 55, 64] used to estimate the level knowledge in individuals with T2DM. The number of items was between eight [59] and 24 items [64]. There was a significant variation in knowledge of type 2 diabetes scores across different studies.

### Publication bias

The presence of publication bias was visually evaluated using a funnel plot for the primary outcome (glycemic control), and the result also reported there was no publication bias (Fig. 8). Likewise, Egger's test also showed no publication bias ( $P = 0.732$ ). On the other hands, there were insufficient data to generate funnel plots to assess for the potential presence of publication bias for the second outcome (knowledge about T2DM).

### **The Overall Quality of the evidence**

The overall quality of evidence was assessed using the GRADE approach and the results are presented in the summary of findings for the main comparison. Findings showed that the overall certainty of the evidence for glycemic control was moderate, which suggests further studies will increase our confidence in the estimate of effect size. The Quality of evidence for diabetes knowledge was low, which reflects that the effect size is limited and the true effect may be substantially different from the estimate of the effect size.

## Summary of findings 1:

**[educational intervention] compared to [usual care] for [type 2 diabetes patients]**

Patient or population: [patients with type 2 diabetes ]

Setting:

Intervention: [educational interventions]

Comparison: [usual care]

| Outcomes                                                                                                                      | Anticipated absolute effects* (95% CI) |                                                | Relative effect (95% CI) | No of participants (studies) | Certainty of the evidence (GRADE) | Comments                                                                                                                                                                                                                                                                                                                                                                               |
|-------------------------------------------------------------------------------------------------------------------------------|----------------------------------------|------------------------------------------------|--------------------------|------------------------------|-----------------------------------|----------------------------------------------------------------------------------------------------------------------------------------------------------------------------------------------------------------------------------------------------------------------------------------------------------------------------------------------------------------------------------------|
|                                                                                                                               | Risk with [comparison]                 | Risk with [intervention]                       |                          |                              |                                   |                                                                                                                                                                                                                                                                                                                                                                                        |
| glycemic control (HbA1c) measured with: difference in mean HbA1c level after intervention<br>Scale from: 1 month to 12 months | -                                      | MD 0.83 lower (1.17 lower to 0.49 lower)       | -                        | 2474 (19 RCTs)               | ⊕⊕⊕○<br>MODERATE <sub>a,b</sub>   | a. majority of studies had high or unclear risks of bias for allocation concealment and blinding of participants or investigators. One out of two studies reported low risk methods for blinding of outcome assessment.<br>b. The certainty in the evidence was downgraded due to imprecision in the intervention, inconsistent with duration of intervention and intervention design. |
| diabetes knowledge assessed with: diabetes and medication knowledge<br>Scale from: 1 month to 12 months                       | -                                      | SMD 1.16 SD higher (0.71 higher to 1.6 higher) | -                        | 1309 (10 RCTs)               | ⊕⊕○○<br>LOW <sub>c,d</sub>        | c. Bias was judged to be at ' ' high risk' in this trial.<br>d. Heterogeneity was high in this trial.                                                                                                                                                                                                                                                                                  |

\*The risk in the intervention group (and its 95% confidence interval) is based on the assumed risk in the comparison group and the relative effect of the intervention (and its 95% CI).

CI: Confidence interval; MD: Mean difference; SMD: Standardized mean difference

**GRADE Working Group grades of evidence**

**High certainty:** We are very confident that the true effect lies close to that of the estimate of the effect

**Moderate certainty:** We are moderately confident in the effect estimate: The true effect is likely to be close to the estimate of the effect, but there is a possibility that it is substantially different

**Low certainty:** Our confidence in the effect estimate is limited: The true effect may be substantially different from the estimate of the effect

**Very low certainty:** We have very little confidence in the effect estimate: The true effect is likely to be substantially different from the estimate of effect

## Discussion

Currently diabetes has been becoming a public health problem that needs effective educational interventions which apply across age, ethnicities, and socioeconomic levels. Evidence showed that appropriate self-management education are suggested as a vital component of clinical care to improve glycemic levels and change behavioral outcomes [67]. In the current meta-analysis to generate high quality of evidence, only clinical trials studies were included.

This review summarises 19 RCT studies of educational interventions involving 2,708 study participants with T2DM that took place in different global regions and health systems. In the present meta-analysis, findings demonstrated that educational intervention has a promising effect on glycemic control and diabetes knowledge. The finding revealed that educational interventions reduced HbA1c levels by 0.83% (95% CI: 1.17 %, 0.49%) among T2DM patients. This finding has substantial degree heterogeneity ( $I^2 = 88\%$ ) indicating variation between included studies. However, there was a slight reduction of mean difference after sensitivity analysis, 0.70% (95% CI: 0.96 %, 0.44%), with a moderate degree of heterogeneity ( $I^2=73\%$ ). Our findings are supported by previous meta-analysis, which reported that behavioral and self-management education have a significant benefit in the reduction of HbA1c levels in patients with diabetes [26, 34, 35].

The improvement in glycemic levels is considered to be clinically essential. The UK Diabetes Study revealed that with each 1% reduction in HbA1c is a likelihood to reduce the risk of diabetes complications by 21% [68]. Similarly, study showed that achieving optimal glycemic level is likely to reduce the risk of deaths from diabetes complications such as cardiovascular and cerebrovascular problems [69]. Moreover, the American Diabetes Association recognizes that diabetes self-management has vital role to improve glycemic levels and reduce diabetes related complications [70].

In the current meta-analysis, subgroup analysis was conducted based on the duration of the educational interventions. Concerning duration of intervention, there was a variation between  $\leq 3$  months, 3-6 months, and  $> 6$  months to the reduction of HbA1c levels. In this meta-analysis, the pooled effect size for short educational interventions (duration  $\leq 3$ -month) was better than the effect size of longer interventions (duration 3-6 month and  $>6$ -month)  $-1.09$  (95% CI;  $-1.60, -$

0.57,  $P < 0.001$ ). One possible explanation maybe associated with the initial motivation of the participant to be empowered to obtain positive results in a short period [71]. In contrary, previous studies reported that longer duration of interventions were more likely related with a significant reduction in HbA1c levels [26, 72, 73]. Similarly, a meta-analysis study showed that more contact hours were associated with a reduction of HbA1c level [30]. Moreover, evidence also supported that the duration of contact hours between trainer and patient have a substantial impact on glycated hemoglobin levels [18]. The current findings reflects that the duration of intervention would influence the effectiveness of the educational intervention among T2DM patients. Therefore, this disparity should be considered when developing future education interventions.

In the present review subgroup analysis was conducted based on interventions design (theory-based versus empirical educational). Our study indicated that educational interventions benefited all patients regardless of the intervention design. In the current findings empirical educational intervention showed better improvement in glycemic control level  $-1.03$  (95% CI;  $-1.90, -0.15$ ,  $P < 0.001$ ). Similarly, evidence showed that interactive self-management interventions through evidence-based approaches and structured curricula is crucial to improve glycemic control and behavioral outcomes [74]. However, other review indicates that, in patients with T2DM, theory-based self-management educational interventions improved HbA1c [33]. Although one-third of the included studies used an empirical approach in designing interventions, and favorable results on glycemic control were obtained; their specific role in educational interventions has been debated.

In this review diabetes knowledge showed significantly a higher standardized mean score of correct knowledge of diabetes among the intervention group as compared to the standard care group (SMD = 1.16; 95%CI: 0.71, 1.60,  $p < 0.001$ ). Similarly, educational interventions were associated with significant improvements in knowledge of diabetes being reported in the previous meta-analyses [75, 76]. Moreover, there is evidence that education improve knowledge and subsequently promoting behavioral changes among patients with end-stage renal disease [77]. Though significant changes were observed in diabetes knowledge, this finding should be applied with caution due to the significant degree of heterogeneity among included studies.

## Limitations

1  
2  
3 Our study has some limitations that need to be considered in the future. First, studies published  
4 in the English language were only considered for this systematic review. Second, there was  
5 variation in the included studies in terms of healthcare providers, component of interventions,  
6 outcome measure, and intervention methods. Third, it may be lacked global representativeness  
7 because no data were found from all countries of the globe. Fourth, although all the included  
8 studies were randomized controlled trials, some trials had the following biases; lack of allocation  
9 concealment, blinding, and intention-to-treat analysis.  
10  
11  
12  
13  
14  
15

## 16 **Conclusion**

17  
18 Our study findings showed that educational intervention have significant benefits over routine  
19 care in terms of reducing glycemic levels and improving diabetes knowledge. Therefore,  
20 clinician should make an effort to provide such care to ensure glycemic control and to improve  
21 knowledge of T2DM. Further research is needed to determine the clinical significance of these  
22 improvements and their cost-effectiveness.  
23  
24  
25  
26  
27

## 28 **Implications for practice**

29  
30 Overall, these data revealed that educational interventions provide a basic benchmark to reduce  
31 glycemic levels and to improve knowledge of T2DM. Importantly, to implement a successful  
32 education intervention, it is necessary to consider the duration of intervention and intervention  
33 design (empirical education is more effective) in patients with T2DM. Therefore, clinician  
34 should use educational interventions to improve glycemic control and diabetes knowledge  
35 among T2DM patients. However, before making a practice decision based on the current review,  
36 further information from other reviews considering how the role of educational intervention  
37 reduced glycemic level and improved diabetes knowledge should be taken into account. Hence,  
38 the certainty of this evidence is not adequate to conclude that interventions will be effective  
39 among T2DM patients.  
40  
41  
42  
43  
44  
45  
46  
47

## 48 **Implications for research**

49  
50 Further research is likely to change the estimated effect size of educational interventions in  
51 glycemic control and knowledge of T2DM patients. Knowledge of diabetes was assessed using  
52 different tools, outcome data was measured in heterogeneous ways. Based on this review, future  
53 studies of educational intervention would increase our certainty of evidence either these  
54  
55  
56  
57  
58  
59  
60



1  
2  
3 interventions improve knowledge of diabetes or not by overcome limitations of existing studies.  
4 Therefore, future educational interventions studies should be designed to evaluate individual  
5 centered outcomes and that are becoming new priorities to support in clinical decision-making.  
6  
7

### 8 9 **List of abbreviations**

10  
11 GRADE: Grading of Recommendations Assessment, Development, and Evaluation; HbA1c:  
12 glycosylated hemoglobin level; IDF: International Diabetes Federation; PRESS: Peer Review of  
13 Electronic Search Strategies; PRISMA: Preferred Reporting Items for Systematic Review and  
14 Meta-Analysis statement; T2DM: type 2 diabetes mellitus; WHO: World Health Organization.  
15  
16  
17  
18

### 19 **Declaration**

#### 20 21 **Ethics approval and consent to participate**

22  
23 Not applicable.  
24  
25

#### 26 27 **Consent for publication**

28  
29 Not applicable.  
30  
31

#### 32 33 **Availability of data and materials**

34 All relevant data are within the paper and supporting information files. There is no separate data  
35 set to share.  
36  
37

#### 38 39 **Competing interests**

40 The authors declare that they have no competing interests.  
41  
42

#### 43 44 **Funding**

45 Not applicable.  
46  
47

#### 48 49 **Authors' contributions**

50 WSS, YAA, and TYA developed the protocol and were involved in the design, selection of  
51 study, data extraction, statistical analysis, and developing the initial drafts of the manuscript.  
52 AMK, WSS, PMP, and MD were involved in data extraction, quality assessment, statistical  
53  
54  
55  
56  
57

1  
2  
3 analysis, and revising. WSS and YAA prepared and edited the final draft of the manuscript. All  
4 authors read and approved the final draft of the manuscript.  
5  
6

## 7 **Acknowledgments**

8  
9 Not applicable  
10

## 11 **References**

- 12  
13  
14 1. Fan W: **Epidemiology in diabetes mellitus and cardiovascular disease.**  
15 *Cardiovascular endocrinology* 2017, **6**(1):8.  
16
- 17 2. World Health organization GroD, Geneva, 2016. Accessed 30 August 2016.  
18
- 19 3. Cho N, Shaw J, Karuranga S, Huang Y, da Rocha Fernandes J, Ohlrogge A, Malanda B:  
20 **IDF Diabetes Atlas: Global estimates of diabetes prevalence for 2017 and**  
21 **projections for 2045.** *Diabetes research and clinical practice* 2018, **138**:271-281.  
22
- 23 4. International diabetes federation. *IDF Diabetes Atlas teB*, Belgium: International  
24 Diabetes Federation. 2015. .  
25
- 26 5. Zheng Y, Ley SH, Hu FB: **Global aetiology and epidemiology of type 2 diabetes**  
27 **mellitus and its complications.** *Nature Reviews Endocrinology* 2018, **14**(2):88.  
28
- 29 6. Lyles CR, Grothaus L, Reid RJ, Sarkar U, Ralston JD: **Communication about diabetes**  
30 **risk factors during between-visit encounters.** *The American Journal of Managed Care*  
31 2012, **18**(12):807-815.  
32
- 33 7. Meng X-H, Huang Y-X, Rao D-P, Zhang Q, Liu Q: **Comparison of three data mining**  
34 **models for predicting diabetes or prediabetes by risk factors.** *The Kaohsiung journal*  
35 *of medical sciences* 2013, **29**(2):93-99.  
36
- 37 8. Organization WH: **Global report on diabetes.** 2016.  
38
- 39 9. Association AD: **6. Glycemic Targets: Standards of Medical Care in Diabetes-2020.**  
40 *Diabetes Care* 2020, **43**(Suppl 1):S66.  
41
- 42 10. Gibbons CH, Goebel-Fabbri A: **Microvascular complications associated with rapid**  
43 **improvements in glycemic control in diabetes.** *Current diabetes reports* 2017,  
44 **17**(7):48.  
45
- 46 11. Haghightapanah M, Nejad ASM, Haghightapanah M, Thunga G, Mallayasamy S:  
47 **Factors that correlate with poor glycemic control in type 2 diabetes mellitus patients**  
48 **with complications.** *Osong public health and research perspectives* 2018, **9**(4):167.  
49  
50  
51  
52  
53  
54  
55  
56  
57

12. Dutta T, Kudva YC, Persson X-MT, Schenck LA, Ford GC, Singh RJ, Carter R, Nair KS: **Impact of long-term poor and good glycaemic control on metabolomics alterations in type 1 diabetic people.** *The Journal of Clinical Endocrinology & Metabolism* 2016, **101(3):1023-1033.**
13. Lau C-Y, Qureshi A, Scott S: **Association between glycaemic control and quality of life in diabetes mellitus.** *Journal of postgraduate medicine* 2004, **50(3):189.**
14. Degli Esposti L, Saragoni S, Buda S, Sturani A, Degli Esposti E: **Glycemic control and diabetes-related health care costs in type 2 diabetes; retrospective analysis based on clinical and administrative databases.** *ClinicoEconomics and outcomes research: CEOR* 2013, **5:193.**
15. Turnbull F, Abraira C, Anderson RJ, Byington R, Chalmers J, Duckworth W, Evans G, Gerstein H, Holman R, Moritz T: **Intensive glucose control and macrovascular outcomes in type 2 diabetes.** In.: Springer; 2009.
16. Hemmingsen B, Lund SS, Gluud C, Vaag A, Almdal T, Hemmingsen C, Wetterslev J: **Intensive glycaemic control for patients with type 2 diabetes: systematic review with meta-analysis and trial sequential analysis of randomised clinical trials.** *Bmj* 2011, **343.**
17. Sharifirad G, Najimi A, Hassanzadeh A, Azadbakht L: **Application of BASNEF educational model for nutritional education among elderly patients with type 2 diabetes: improving the glycaemic control.** *Journal of research in medical sciences: the official journal of Isfahan University of Medical Sciences* 2011, **16(9):1149.**
18. Norris SL, Lau J, Smith SJ, Schmid CH, Engelgau MM: **Self-management education for adults with type 2 diabetes: a meta-analysis of the effect on glycaemic control.** *Diabetes care* 2002, **25(7):1159-1171.**
19. Ellis SE ST, Dittus RS, Brown A, Pichert JW, Elasy TA. Diabetes patient education: a meta-analysis and meta-regression. *Patient education and counseling.* 2004 Jan 1;52(1):97-105.
20. Deakin TA MC, Cade JE, Williams R. Group based training for self-management strategies in people with type 2 diabetes mellitus. *Cochrane database of systematic reviews.* 2005(2).

- 1  
2  
3 21. Soundarya M, Asha A, Mohan V: **Role of a diabetes educator in the management of**  
4 **diabetes**. *International Journal of Diabetes in Developing Countries* 2004, **24**:65-68.
- 5  
6 22. Berikai P, Meyer PM, Kazlauskaitė R, Savoy B, Kozik K, Fogelfeld L: **Gain in patients'**  
7 **knowledge of diabetes management targets is associated with better glycemic**  
8 **control**. *Diabetes care* 2007, **30**(6):1587-1589.
- 9  
10 23. Hartz A, Kent S, James P, Xu Y, Kelly M, Daly J: **Factors that influence improvement**  
11 **for patients with poorly controlled type 2 diabetes**. *Diabetes research and clinical*  
12 *practice* 2006, **74**(3):227-232.
- 13  
14 24. Rhee MK, Slocum W, Ziemer DC, Culler SD, Cook CB, El-Kebbi IM, Gallina DL,  
15 Barnes C, Phillips LS: **Patient adherence improves glycemic control**. *The Diabetes*  
16 *Educator* 2005, **31**(2):240-250.
- 17  
18 25. Bukhsh A, Khan TM, Nawaz MS, Ahmed HS, Chan KG, Goh B-H: **Association of**  
19 **diabetes knowledge with glycemic control and self-care practices among Pakistani**  
20 **people with type 2 diabetes mellitus**. *Diabetes, Metabolic Syndrome and Obesity:*  
21 *Targets and Therapy* 2019, **12**:1409.
- 22  
23 26. Azami G, Soh KL, Sazlina S-G, Salmiah MS, Aazami S: **Behavioral interventions to**  
24 **improve self-management in Iranian adults with type 2 diabetes: a systematic**  
25 **review and meta-analysis**. *Journal of Diabetes & Metabolic Disorders* 2018, **17**(2):365-  
26 380.
- 27  
28 27. Bos M, Agyemang C: **Prevalence and complications of diabetes mellitus in Northern**  
29 **Africa, a systematic review**. *BMC public health* 2013, **13**(1):387.
- 30  
31 28. Somannavar S, Lanthorn H, Deepa M, Pradeepa R, Rema M, Mohan V: **Increased**  
32 **awareness about diabetes and its complications in a whole city: Effectiveness of the**  
33 **“prevention, awareness, counselling and evaluation”[PACE] Diabetes Project**  
34 **[PACE-6]**. *Journal of the Association of Physicians of india* 2008, **56**(7):495-502.
- 35  
36 29. Kassahun T, Gesesew H, Mwanri L, Eshetie T: **Diabetes related knowledge, self-care**  
37 **behaviours and adherence to medications among diabetic patients in Southwest**  
38 **Ethiopia: a cross-sectional survey**. *BMC endocrine disorders* 2016, **16**(1):28.
- 39  
40 30. Chrvala CA, Sherr D, Lipman RD: **Diabetes self-management education for adults**  
41 **with type 2 diabetes mellitus: a systematic review of the effect on glycemic control**.  
42 *Patient education and counseling* 2016, **99**(6):926-943.
- 43  
44  
45  
46  
47  
48  
49  
50  
51  
52  
53  
54  
55  
56  
57

- 1
  - 2
  - 3
  - 4
  - 5
  - 6
  - 7
  - 8
  - 9
  - 10
  - 11
  - 12
  - 13
  - 14
  - 15
  - 16
  - 17
  - 18
  - 19
  - 20
  - 21
  - 22
  - 23
  - 24
  - 25
  - 26
  - 27
  - 28
  - 29
  - 30
  - 31
  - 32
  - 33
  - 34
  - 35
  - 36
  - 37
  - 38
  - 39
  - 40
  - 41
  - 42
  - 43
  - 44
  - 45
  - 46
  - 47
  - 48
  - 49
  - 50
  - 51
  - 52
  - 53
  - 54
  - 55
  - 56
  - 57
  - 58
  - 59
  - 60
31. Schapira MM, Swartz S, Ganschow PS, Jacobs EA, Neuner JM, Walker CM, Fletcher KE: **Tailoring educational and behavioral interventions to level of health literacy: a systematic review.** *MDM policy & practice* 2017, **2**(1):2381468317714474.
32. Murugesan N, Snehalatha C, Shobhana R, Roglic G, Ramachandran A: **Awareness about diabetes and its complications in the general and diabetic population in a city in southern India.** *Diabetes research and clinical practice* 2007, **77**(3):433-437.
33. Zhao FF, Suhonen R, Koskinen S, Leino-Kilpi H: **Theory-based self-management educational interventions on patients with type 2 diabetes: a systematic review and meta-analysis of randomized controlled trials.** *Journal of advanced nursing* 2017, **73**(4):812-833.
34. Hildebrand JA, Billimek J, Lee J-A, Sorkin DH, Olshansky EF, Clancy SL, Evangelista LS: **Effect of diabetes self-management education on glycemic control in Latino adults with type 2 diabetes: A systematic review and meta-analysis.** *Patient education and counseling* 2020, **103**(2):266-275.
35. Aquino JA, Baldoni NR, Flôr CR, Sanches C, Oliveira CDL, Alves GCS, Dal Fabbro AL, Baldoni AO: **Effectiveness of individual strategies for the empowerment of patients with diabetes mellitus: a systematic review with meta-analysis.** *Primary Care Diabetes* 2018, **12**(2):97-110.
36. Moher D, Shamseer L, Clarke M, Ghersi D, Liberati A, Petticrew M, Shekelle P, Stewart LA: **Preferred reporting items for systematic review and meta-analysis protocols (PRISMA-P) 2015 statement.** *Systematic reviews* 2015, **4**(1):1.
37. McGowan J, Sampson M, Salzwedel DM, Cogo E, Foerster V, Lefebvre C: **PRESS peer review of electronic search strategies: 2015 guideline statement.** *Journal of clinical epidemiology* 2016, **75**:40-46.
38. Higgins JP: **Cochrane handbook for systematic reviews of interventions version 5.0. 1. The Cochrane Collaboration.** <http://www.cochrane-handbook.org> 2008.
39. Higgins J: **Green S, editor., eds. Cochrane Handbook for Systematic Reviews of Interventions. Version 5.1. 0 [updated March 2011]. The Cochrane Collaboration; 2011. In.; 2016.**

- 1  
2  
3  
4  
5  
6  
7  
8  
9  
10  
11  
12  
13  
14  
15  
16  
17  
18  
19  
20  
21  
22  
23  
24  
25  
26  
27  
28  
29  
30  
31  
32  
33  
34  
35  
36  
37  
38  
39  
40  
41  
42  
43  
44  
45  
46  
47  
48  
49  
50  
51  
52  
53  
54  
55  
56  
57  
58  
59  
60
40. Higgins JP, Altman DG, Gøtzsche PC, Jüni P, Moher D, Oxman AD, Savović J, Schulz KF, Weeks L, Sterne JA: **The Cochrane Collaboration's tool for assessing risk of bias in randomised trials.** *Bmj* 2011, **343**:d5928.
  41. Guyatt GH, Oxman AD, Kunz R, Vist GE, Falck-Ytter Y, Schünemann HJ: **What is "quality of evidence" and why is it important to clinicians?** *Bmj* 2008, **336**(7651):995-998.
  42. GRADEpro G: **GRADEpro guideline development tool [software].** *McMaster University* 2015.
  43. Borenstein M, Hedges LV, Higgins JP, Rothstein HR: **A basic introduction to fixed-effect and random-effects models for meta-analysis.** *Research synthesis methods* 2010, **1**(2):97-111.
  44. JP H: **Thompson SG. Decks 1]. Altman DG. Measuring inconsistency in meta» analyses.** *BMJ* 2003.
  45. Cohen J: **Statistical power analysis for the behavioral sciences:** Academic press; 2013.
  46. Egger M, Smith GD, Schneider M, Minder C: **Bias in meta-analysis detected by a simple, graphical test. Increase in studies of publication bias coincided with increasing use of meta-analysis.** *British Medical Journal* 1997, **316**:629-634.
  47. Sterne J, Sutton A: **Ioannidis JP, Terrin N, Jones DR, Lau J, et al. Recommendations for examining and interpreting funnel plot asymmetry in meta-analyses of randomized controlled trials** *BMJ* 2011, **343**:d4002.
  48. Cani CG, Lopes LdSG, Queiroz M, Nery M: **Improvement in medication adherence and self-management of diabetes with a clinical pharmacy program: a randomized controlled trial in patients with type 2 diabetes undergoing insulin therapy at a teaching hospital.** *Clinics* 2015, **70**(2):102-106.
  49. Grillo MdFF, Neumann CR, Scain SF, Rozeno RF, Beloli L, Perinetti T, Gross JL, Leitão CB: **Diabetes education in primary care: a randomized clinical trial.** *Cadernos de Saude Publica* 2016, **32**:e00097115.
  50. Zheng F, Liu S, Liu Y, Deng L: **Effects of an outpatient diabetes self-management education on patients with type 2 diabetes in China: a randomized controlled trial.** *Journal of diabetes research* 2019, **2019**.

- 1  
2  
3 51. Jiang XJ, Jiang H, Lu YH, Liu SL, Wang JP, Tang RS, Li MZ: **The effectiveness of a self-efficacy-focused structured education programme on adults with type 2 diabetes: A multicentre randomised controlled trial.** *Journal of clinical nursing* 2019, **28**(17-18):3299-3309.
- 4  
5  
6  
7  
8  
9  
10 52. Kong J-X, Zhu L, Wang H-M, Li Y, Guo A-Y, Gao C, Miao Y-Y, Wang T, Lu X-Y, Zhu H-H: **Effectiveness of the Chronic Care Model in Type 2 Diabetes Management in a Community Health Service Center in China: A Group Randomized Experimental Study.** *Journal of Diabetes Research* 2019, **2019**.
- 11  
12  
13  
14  
15  
16  
17 53. Hermanns N, Kulzer B, Maier B, Mahr M, Haak T: **The effect of an education programme (MEDIAS 2 ICT) involving intensive insulin treatment for people with type 2 diabetes.** *Patient education and counseling* 2012, **86**(2):226-232.
- 18  
19  
20  
21  
22 54. Braun AK, Kubiak T, Kuntsche J, Meier-Höfig M, Müller UA, Feucht I, Zeyfang A: **SGS: a structured treatment and teaching programme for older patients with diabetes mellitus—a prospective randomised controlled multi-centre trial.** *Age and ageing* 2009, **38**(4):390-396.
- 23  
24  
25  
26  
27  
28  
29 55. Didarloo A, Shojaeizadeh D, Alizadeh M: **Impact of educational intervention based on interactive approaches on beliefs, behavior, hemoglobin A1c, and quality of life in diabetic women.** *International journal of preventive medicine* 2016, **7**.
- 30  
31  
32  
33  
34 56. Askari A, Jeihooni AK, Kashfi SM, Marzban A, Khiyali Z: **The effect of educational program based on belief, attitude, subjective norm, and enabling factors model on changing the metabolic indices in elderly patients with type II diabetes.** *International Journal of Preventive Medicine* 2018, **9**.
- 35  
36  
37  
38  
39  
40  
41 57. Azami G SK, Sazlina SG, Salmiah M, Aazami S, Mozafari M, Taghinejad H. Effect of a nurse-led diabetes self-management education program on glycosylated hemoglobin among adults with type 2 diabetes. *Journal of diabetes research.* 2018 Jul 8;2018.
- 42  
43  
44  
45  
46 58. Ebrahimi H, Sadeghi M, Amanpour F, Vahedi H: **Evaluation of empowerment model on indicators of metabolic control in patients with type 2 diabetes, a randomized clinical trial study.** *Primary care diabetes* 2016, **10**(2):129-135.
- 47  
48  
49  
50  
51 59. Nejhaddadgar N, Darabi F, Rohban A, Solhi M: **The effectiveness of self-management program for people with type 2 diabetes mellitus based on PRECEDE-PROCEDE**
- 52  
53  
54  
55  
56  
57  
58  
59  
60

- 1  
2  
3 **model.** *Diabetes & Metabolic Syndrome: Clinical Research & Reviews* 2019, **13**(1):440-  
4 443.  
5  
6  
7 60. Tan MY MJ, Chee SS, Lee LF, Tan MH. A brief structured education programme  
8 enhances self-care practices and improves glycaemic control in Malaysians with poorly  
9 controlled diabetes. *Health education research.* 2011 Oct 1;26(5):896-907.  
10  
11 61. Ramadas A CC, Oldenburg B, Hussein Z, Quek KF. Randomised-controlled trial of a  
12 web-based dietary intervention for patients with type 2 diabetes: changes in health  
13 cognitions and glycaemic control. *BMC Public Health.* 2018 Dec 1;18(1):716.  
14  
15 62. Hörnsten Å SH, Lundman B, Sandström H. Improvements in HbA1c remain after 5  
16 years—a follow up of an educational intervention focusing on patients' personal  
17 understandings of type 2 diabetes. *Diabetes research and clinical practice.* 2008 Jul  
18 1;81(1):50-5.  
19  
20 63. Adolfsson ET W-EM, Smide B, Wikblad K. Patient education in type 2 diabetes—a  
21 randomized controlled 1-year follow-up study. *Diabetes research and clinical practice.*  
22 2007 Jun 1;76(3):341-50.  
23  
24 64. Wichit N, Mnatzaganian G, Courtney M, Schulz P, Johnson M: **Randomized controlled**  
25 **trial of a family-oriented self-management program to improve self-efficacy,**  
26 **glycaemic control and quality of life among Thai individuals with Type 2 diabetes.**  
27 *Diabetes research and clinical practice* 2017, **123**:37-48.  
28  
29 65. Jayasuriya R PM, Jayawardena R, Kasturiratne A, de Zoysa P, Godamunne P, Gamage S,  
30 Wickremasinghe AR. Translational research for diabetes self-management in Sri Lanka:  
31 a randomized controlled trial. *Primary care diabetes.* 2015 Oct 1;9(5):338-45.  
32  
33 66. Fan M-H, Huang B-T, Tang Y-C, Han X-H, Dong W-W, Wang L-X: **Effect of**  
34 **individualized diabetes education for type 2 diabetes mellitus: a single-center**  
35 **randomized clinical trial.** *African health sciences* 2016, **16**(4):1157-1162.  
36  
37 67. Association AD: **Standards of medical care in diabetes—2019 abridged for primary**  
38 **care providers.** *Clinical diabetes: a publication of the American Diabetes Association*  
39 2019, **37**(1):11.  
40  
41 68. Stratton IM, Adler AI, Neil HAW, Matthews DR, Manley SE, Cull CA, Hadden D,  
42 Turner RC, Holman RR: **Association of glycaemia with macrovascular and**  
43  
44  
45  
46  
47  
48  
49  
50  
51  
52  
53  
54  
55  
56  
57  
58  
59  
60



- 1  
2  
3 **microvascular complications of type 2 diabetes (UKPDS 35): prospective**  
4 **observational study.** *Bmj* 2000, **321**(7258):405-412.
- 5  
6  
7 69. Association AD: **Implications of the diabetes control and complications trial.**  
8 *Diabetes care* 2002, **25**(suppl 1):s25-s27.
- 9  
10  
11 70. Association AD: **4. Foundations of care: education, nutrition, physical activity,**  
12 **smoking cessation, psychosocial care, and immunization.** *Diabetes care* 2015,  
13 **38**(Supplement 1):S20-S30.
- 14  
15  
16 71. Funnell MM, Anderson RM: **Empowerment and self-management of diabetes.**  
17 *Clinical diabetes* 2004, **22**(3):123-127.
- 18  
19  
20 72. McEwen MM, Pasvogel A, Gallegos G, Barrera L: **Type 2 diabetes Self-Management**  
21 **social support intervention at the US-Mexico border.** *Public Health Nursing* 2010,  
22 **27**(4):310-319.
- 23  
24  
25 73. Glazier RH, Bajcar J, Kennie NR, Willson K: **A systematic review of interventions to**  
26 **improve diabetes care in socially disadvantaged populations.** *Diabetes care* 2006,  
27 **29**(7):1675-1688.
- 28  
29  
30 74. Rickheim PL, Weaver TW, Flader JL, Kendall DM: **Assessment of group versus**  
31 **individual diabetes education: a randomized study.** *Diabetes care* 2002, **25**(2):269-  
32 274.
- 33  
34  
35 75. Creamer J, Attridge M, Ramsden M, Cannings-John R, Hawthorne K: **Culturally**  
36 **appropriate health education for Type 2 diabetes in ethnic minority groups: an**  
37 **updated Cochrane Review of randomized controlled trials.** *Diabetic Medicine* 2016,  
38 **33**(2):169-183.
- 39  
40  
41 76. Cheng L, Sit JW, Choi Kc, Chair Sy, Li X, He Xl: **Effectiveness of interactive**  
42 **self-management interventions in individuals with poorly controlled type 2 diabetes:**  
43 **A meta-analysis of randomized controlled trials.** *Worldviews on Evidence-Based*  
44 *Nursing* 2017, **14**(1):65-73.
- 45  
46  
47  
48 77. Tsay S-L, Hung L-O: **Empowerment of patients with end-stage renal disease—a**  
49 **randomized controlled trial.** *International Journal of nursing studies* 2004, **41**(1):59-  
50 65.  
51  
52  
53  
54  
55  
56  
57  
58  
59  
60

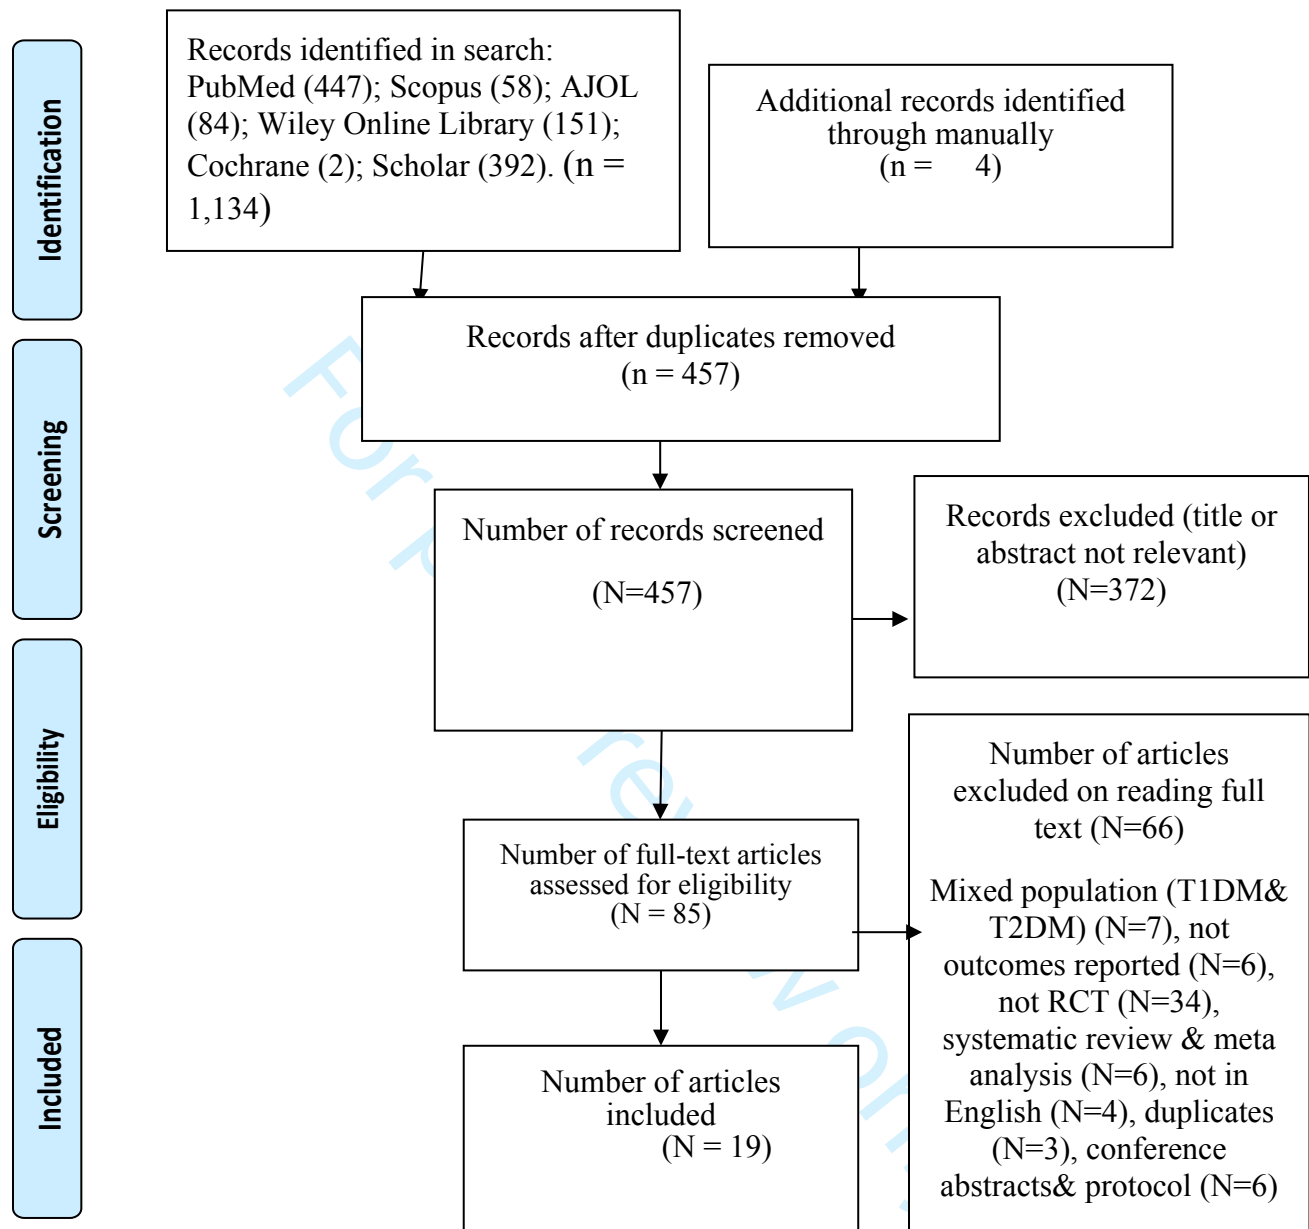

Figure 1. PRISMA flow chart for selection of studies

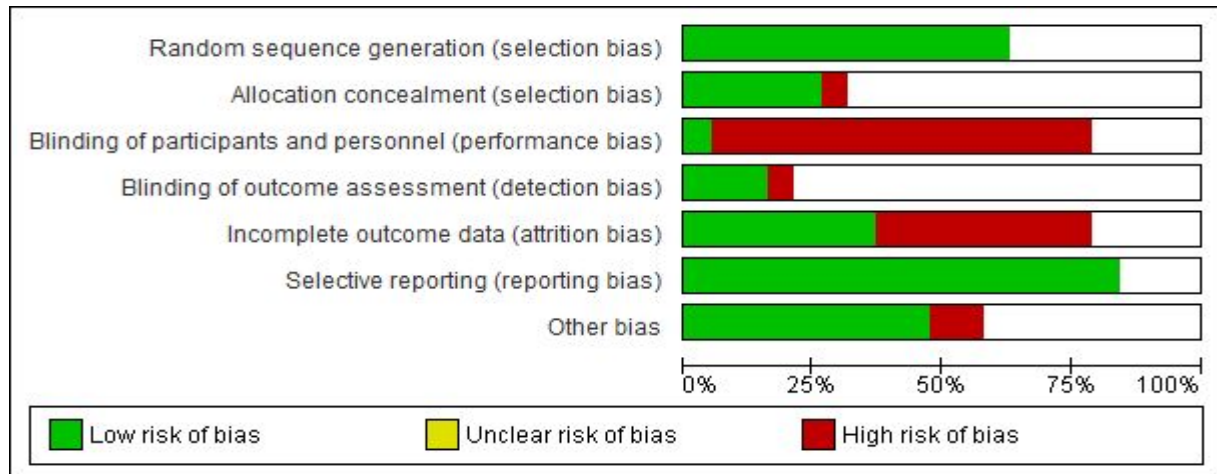

Figure 2. Risk of bias graph: review authors' judgments about each risk of bias item presented as percentages across all included studies.

|                             | Random sequence generation (selection bias) | Allocation concealment (selection bias) | Blinding of participants and personnel (performance bias) | Blinding of outcome assessment (detection bias) | Incomplete outcome data (attrition bias) | Selective reporting (reporting bias) | Other bias |
|-----------------------------|---------------------------------------------|-----------------------------------------|-----------------------------------------------------------|-------------------------------------------------|------------------------------------------|--------------------------------------|------------|
| Adolfsson ET W-EM , 2017    | +                                           |                                         | +                                                         |                                                 | +                                        |                                      | +          |
| Askari A, 2018              |                                             | +                                       | +                                                         |                                                 |                                          | +                                    |            |
| Azami G SK et al, 2018      | +                                           | +                                       | +                                                         |                                                 | +                                        | +                                    | +          |
| Braun AK et al, 2009        | +                                           |                                         | +                                                         |                                                 | +                                        | +                                    |            |
| Cani CG et al, 2015         |                                             |                                         | +                                                         |                                                 | +                                        | +                                    |            |
| Didarloo A , 2016           |                                             | +                                       | +                                                         |                                                 | +                                        | +                                    | +          |
| Ebrahimi H, 2016            | +                                           |                                         | +                                                         | +                                               | +                                        | +                                    |            |
| Grillo MdFF etal, 2016      | +                                           |                                         | +                                                         | +                                               | +                                        |                                      | +          |
| Hermanns N , 2012           | +                                           |                                         |                                                           |                                                 | +                                        | +                                    | +          |
| Hörnsten Å SH , 2008        |                                             |                                         | +                                                         |                                                 |                                          | +                                    | +          |
| Jayasuriya R PM et al, 2015 | +                                           |                                         | +                                                         |                                                 | +                                        | +                                    |            |
| Jiang XJ et al, 2019        | +                                           | +                                       |                                                           |                                                 | +                                        | +                                    | +          |
| Kong J-X et al, 2019        |                                             |                                         |                                                           |                                                 | +                                        | +                                    |            |
| Min-Hua Fan et al, 2016     |                                             |                                         | +                                                         |                                                 | +                                        | +                                    | +          |
| Nejhaddadgar N, 2019        |                                             |                                         |                                                           |                                                 |                                          | +                                    |            |
| Ramadas A CC, 2018          | +                                           |                                         | +                                                         | +                                               | +                                        |                                      | +          |
| Tan MY MJ et al, 2011       | +                                           |                                         | +                                                         |                                                 | +                                        | +                                    |            |
| Wichit N et al, 2017        | +                                           | +                                       | +                                                         | +                                               | +                                        | +                                    | +          |
| Zheng F , 2019              | +                                           | +                                       | +                                                         |                                                 |                                          | +                                    | +          |

Figure 3. Risk of bias summary: review authors' judgments about each risk of bias item for each included study.

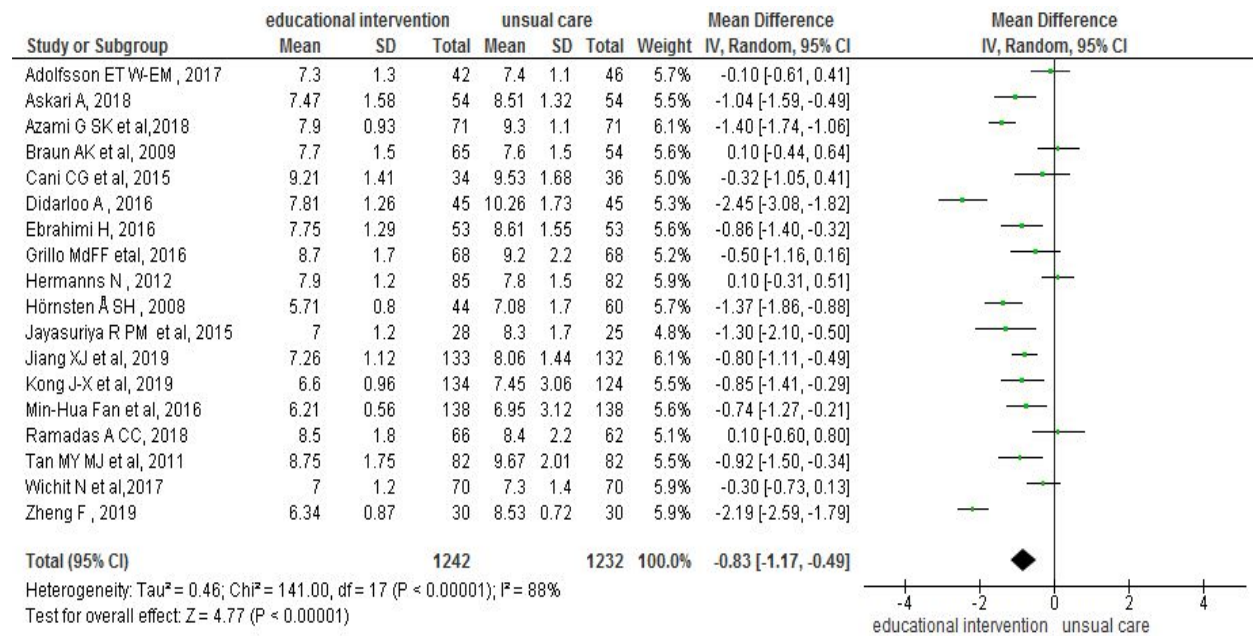

Figure 4. The pooled effect of education interventions on HbA1c levels in patients with T2DM

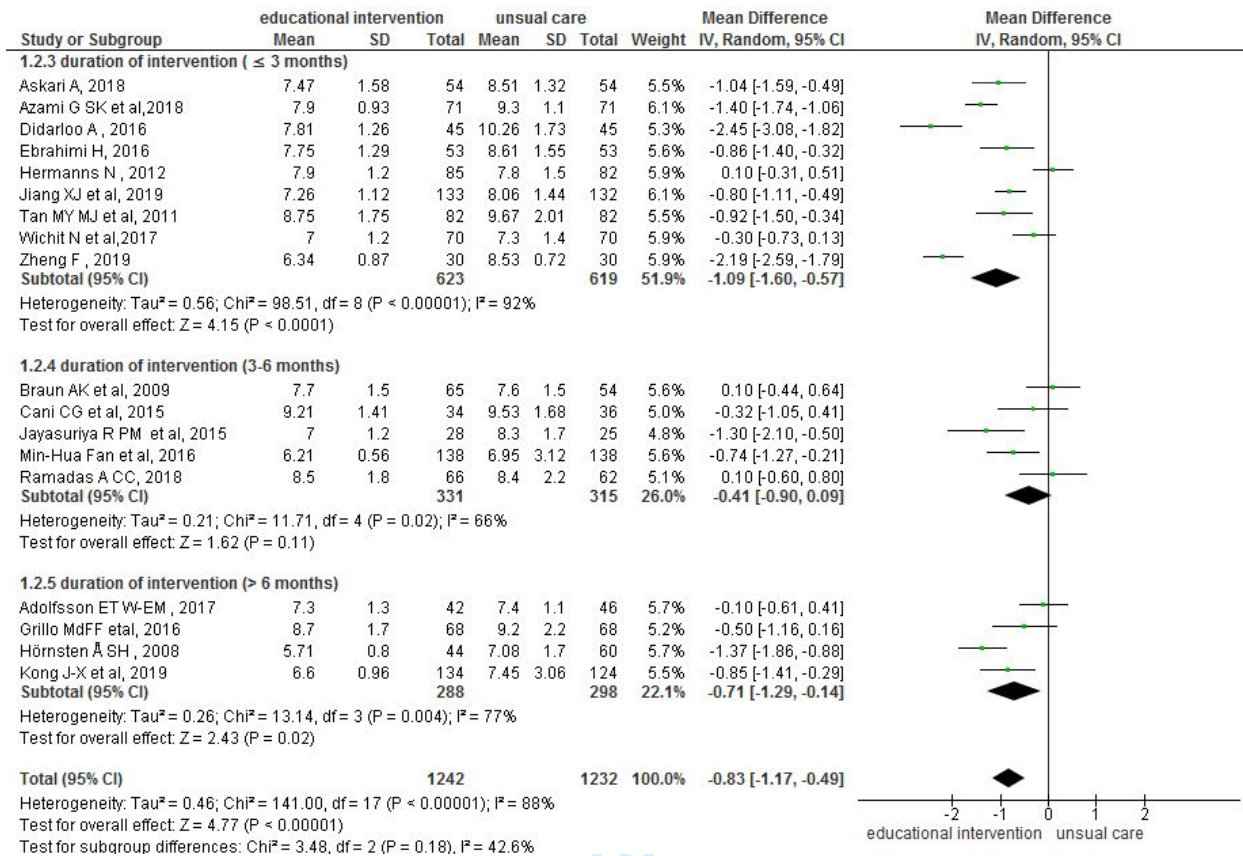

Figure 5. Subgroup analysis based on the duration of the intervention

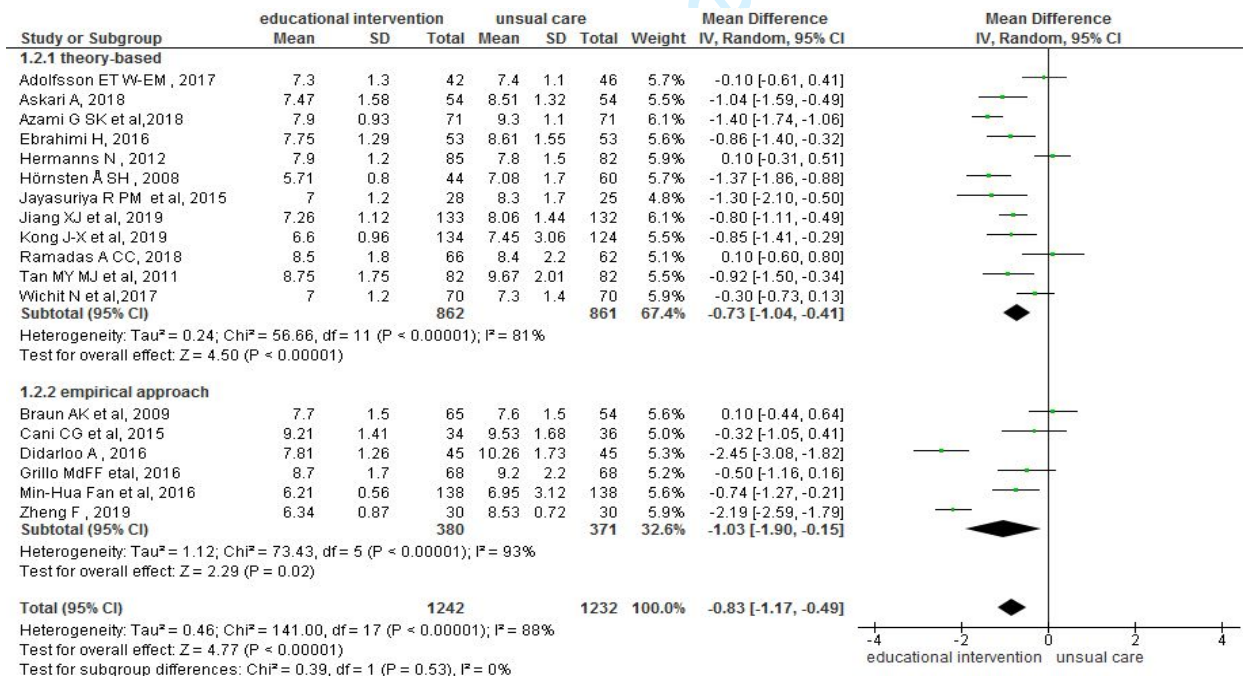

Figure 6. Subgroup analysis based on intervention design

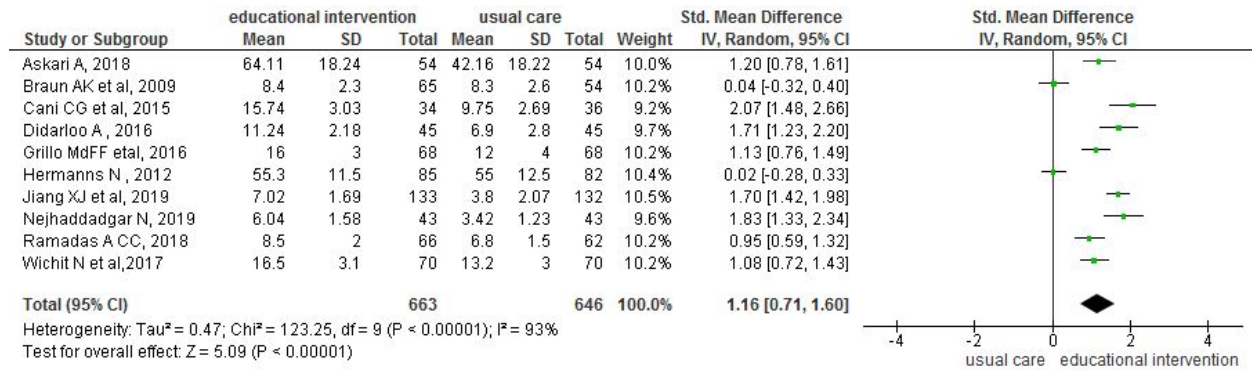

Figure 7. The pooled effect of education interventions on disease knowledge in patients with T2DM.

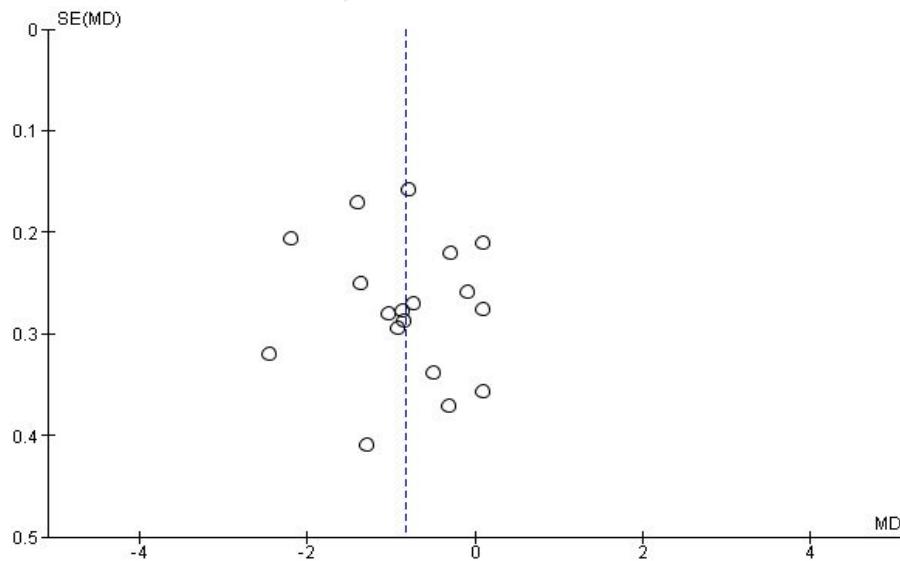

Figure 8. Funnel plot for HbA1c results.

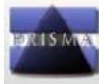

# PRISMA 2009 Checklist

1  
2  
3  
4  
5  
6  
7  
8  
9  
10  
11  
12  
13  
14  
15  
16  
17  
18  
19  
20  
21  
22  
23  
24  
25  
26  
27  
28  
29  
30  
31  
32  
33  
34  
35  
36  
37  
38  
39  
40  
41  
42  
43  
44  
45  
46  
47

| Section/topic                      | #  | Checklist item                                                                                                                                                                                                                                                                                              | Reported on page # |
|------------------------------------|----|-------------------------------------------------------------------------------------------------------------------------------------------------------------------------------------------------------------------------------------------------------------------------------------------------------------|--------------------|
| <b>TITLE</b>                       |    |                                                                                                                                                                                                                                                                                                             |                    |
| Title                              | 1  | Identify the report as a systematic review, meta-analysis, or both.                                                                                                                                                                                                                                         | 1                  |
| <b>ABSTRACT</b>                    |    |                                                                                                                                                                                                                                                                                                             |                    |
| Structured summary                 | 2  | Provide a structured summary including, as applicable: background; objectives; data sources; study eligibility criteria, participants, and interventions; study appraisal and synthesis methods; results; limitations; conclusions and implications of key findings; systematic review registration number. | 2                  |
| <b>INTRODUCTION</b>                |    |                                                                                                                                                                                                                                                                                                             |                    |
| Rationale                          | 3  | Describe the rationale for the review in the context of what is already known.                                                                                                                                                                                                                              | 3-4                |
| Objectives                         | 4  | Provide an explicit statement of questions being addressed with reference to participants, interventions, comparisons, outcomes, and study design (PICOS).                                                                                                                                                  | 4                  |
| <b>METHODS</b>                     |    |                                                                                                                                                                                                                                                                                                             |                    |
| Protocol and registration          | 5  | Indicate if a review protocol exists, if and where it can be accessed (e.g., Web address), and, if available, provide registration information including registration number.                                                                                                                               | CRD42020205838     |
| Eligibility criteria               | 6  | Specify study characteristics (e.g., PICOS, length of follow-up) and report characteristics (e.g., years considered, language, publication status) used as criteria for eligibility, giving rationale.                                                                                                      | 5-6                |
| Information sources                | 7  | Describe all information sources (e.g., databases with dates of coverage, contact with study authors to identify additional studies) in the search and date last searched.                                                                                                                                  | 5                  |
| Search                             | 8  | Present full electronic search strategy for at least one database, including any limits used, such that it could be repeated.                                                                                                                                                                               | 5                  |
| Study selection                    | 9  | State the process for selecting studies (i.e., screening, eligibility, included in systematic review, and, if applicable, included in the meta-analysis).                                                                                                                                                   | 6                  |
| Data collection process            | 10 | Describe method of data extraction from reports (e.g., piloted forms, independently, in duplicate) and any processes for obtaining and confirming data from investigators.                                                                                                                                  | 7                  |
| Data items                         | 11 | List and define all variables for which data were sought (e.g., PICOS, funding sources) and any assumptions and simplifications made.                                                                                                                                                                       | NA                 |
| Risk of bias in individual studies | 12 | Describe methods used for assessing risk of bias of individual studies (including specification of whether this was done at the study or outcome level), and how this information is to be used in any data synthesis.                                                                                      | 7                  |
| Summary measures                   | 13 | State the principal summary measures (e.g., risk ratio, difference in means).                                                                                                                                                                                                                               | 8                  |
| Synthesis of results               | 14 | Describe the methods of handling data and combining results of studies, if done, including measures of consistency (e.g., $I^2$ ) for each meta-analysis                                                                                                                                                    | 8                  |



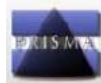

# PRISMA 2009 Checklist

Page 1 of 2

| Section/topic                 | #  | Checklist item                                                                                                                                                                                           | Reported on page # |
|-------------------------------|----|----------------------------------------------------------------------------------------------------------------------------------------------------------------------------------------------------------|--------------------|
| Risk of bias across studies   | 15 | Specify any assessment of risk of bias that may affect the cumulative evidence (e.g., publication bias, selective reporting within studies).                                                             | 8                  |
| Additional analyses           | 16 | Describe methods of additional analyses (e.g., sensitivity or subgroup analyses, meta-regression), if done, indicating which were pre-specified.                                                         | 8                  |
| <b>RESULTS</b>                |    |                                                                                                                                                                                                          |                    |
| Study selection               | 17 | Give numbers of studies screened, assessed for eligibility, and included in the review, with reasons for exclusions at each stage, ideally with a flow diagram.                                          | 8                  |
| Study characteristics         | 18 | For each study, present characteristics for which data were extracted (e.g., study size, PICOS, follow-up period) and provide the citations.                                                             | 9-13               |
| Risk of bias within studies   | 19 | Present data on risk of bias of each study and, if available, any outcome level assessment (see item 12).                                                                                                | 14                 |
| Results of individual studies | 20 | For all outcomes considered (benefits or harms), present, for each study: (a) simple summary data for each intervention group (b) effect estimates and confidence intervals, ideally with a forest plot. | 14                 |
| Synthesis of results          | 21 | Present results of each meta-analysis done, including confidence intervals and measures of consistency.                                                                                                  | 14-15              |
| Risk of bias across studies   | 22 | Present results of any assessment of risk of bias across studies (see Item 15).                                                                                                                          | 15                 |
| Additional analysis           | 23 | Give results of additional analyses, if done (e.g., sensitivity or subgroup analyses, meta-regression [see Item 16]).                                                                                    | 14-15              |
| <b>DISCUSSION</b>             |    |                                                                                                                                                                                                          |                    |
| Summary of evidence           | 24 | Summarize the main findings including the strength of evidence for each main outcome; consider their relevance to key groups (e.g., healthcare providers, users, and policy makers).                     | 18-19              |
| Limitations                   | 25 | Discuss limitations at study and outcome level (e.g., risk of bias), and at review-level (e.g., incomplete retrieval of identified research, reporting bias).                                            | 20                 |
| Conclusions                   | 26 | Provide a general interpretation of the results in the context of other evidence, and implications for future research.                                                                                  | 20                 |
| <b>FUNDING</b>                |    |                                                                                                                                                                                                          |                    |
| Funding                       | 27 | Describe sources of funding for the systematic review and other support (e.g., supply of data); role of funders for the systematic review.                                                               | NA                 |

PRISMA checklist the paper entitled the effect of educational interventions on knowledge and glycemic control in patients with type 2 diabetes mellitus: a systematic review and meta-analysis of randomized controlled trials

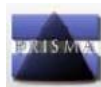

# PRISMA 2009 Checklist

For more information, visit: [www.prisma-statement.org](http://www.prisma-statement.org).

Page 2 of 2

For peer review only

1  
2  
3  
4  
5  
6  
7  
8  
9  
10  
11  
12  
13  
14  
15  
16  
17  
18  
19  
20  
21  
22  
23  
24  
25  
26  
27  
28  
29  
30  
31  
32  
33  
34  
35  
36  
37  
38  
39  
40  
41  
42  
43  
44  
45  
46  
47

# BMJ Open

## The effect of educational interventions on knowledge of the disease and glycemic control in patients with Type 2 diabetes mellitus: a systematic review and meta-analysis of randomized controlled trials

|                                 |                                                                                                                                                                                                                                                                                                                                               |
|---------------------------------|-----------------------------------------------------------------------------------------------------------------------------------------------------------------------------------------------------------------------------------------------------------------------------------------------------------------------------------------------|
| Journal:                        | <i>BMJ Open</i>                                                                                                                                                                                                                                                                                                                               |
| Manuscript ID                   | bmjopen-2021-049806.R1                                                                                                                                                                                                                                                                                                                        |
| Article Type:                   | Original research                                                                                                                                                                                                                                                                                                                             |
| Date Submitted by the Author:   | 24-Aug-2021                                                                                                                                                                                                                                                                                                                                   |
| Complete List of Authors:       | shiferaw, wondimeneh; Debre Berhan University, Yirga, Tadess; Debre Markos University Desta, Melaku; Debre Markos University, Midwifery; Debre Markos University, Midwifery<br>Kassie, Ayelign; Woldia University, Nursing; Petrucka, Pammla; University of Saskatchewan, aynalem, yared; Debre Berhan University, pediatric and child health |
| <b>Primary Subject Heading</b>: | Diabetes and endocrinology                                                                                                                                                                                                                                                                                                                    |
| Secondary Subject Heading:      | Diabetes and endocrinology                                                                                                                                                                                                                                                                                                                    |
| Keywords:                       | EDUCATION & TRAINING (see Medical Education & Training), Diabetes & endocrinology < INTERNAL MEDICINE, General diabetes < DIABETES & ENDOCRINOLOGY, DIABETES & ENDOCRINOLOGY                                                                                                                                                                  |
|                                 |                                                                                                                                                                                                                                                                                                                                               |

SCHOLARONE™  
Manuscripts



I, the Submitting Author has the right to grant and does grant on behalf of all authors of the Work (as defined in the below author licence), an exclusive licence and/or a non-exclusive licence for contributions from authors who are: i) UK Crown employees; ii) where BMJ has agreed a CC-BY licence shall apply, and/or iii) in accordance with the terms applicable for US Federal Government officers or employees acting as part of their official duties; on a worldwide, perpetual, irrevocable, royalty-free basis to BMJ Publishing Group Ltd ("BMJ") its licensees and where the relevant Journal is co-owned by BMJ to the co-owners of the Journal, to publish the Work in this journal and any other BMJ products and to exploit all rights, as set out in our [licence](#).

The Submitting Author accepts and understands that any supply made under these terms is made by BMJ to the Submitting Author unless you are acting as an employee on behalf of your employer or a postgraduate student of an affiliated institution which is paying any applicable article publishing charge ("APC") for Open Access articles. Where the Submitting Author wishes to make the Work available on an Open Access basis (and intends to pay the relevant APC), the terms of reuse of such Open Access shall be governed by a Creative Commons licence – details of these licences and which [Creative Commons](#) licence will apply to this Work are set out in our licence referred to above.

Other than as permitted in any relevant BMJ Author's Self Archiving Policies, I confirm this Work has not been accepted for publication elsewhere, is not being considered for publication elsewhere and does not duplicate material already published. I confirm all authors consent to publication of this Work and authorise the granting of this licence.

1  
2  
3 **The effect of educational interventions on knowledge of the disease and glycemc control in**  
4 **patients with Type 2 diabetes mellitus: a systematic review and meta-analysis of**  
5 **randomized controlled trials**  
6  
7

8  
9 Wondimeneh Shibabaw Shiferaw<sup>1\*</sup>, Tadesse Yirga Akalu<sup>2</sup>, Melaku Desta<sup>3</sup>, Ayelign Mengesha  
10 Kassie<sup>4</sup>, Pammla Margaret Petrucka<sup>5</sup>, Yared Asmare Aynalem<sup>1</sup>  
11  
12

13  
14 <sup>1</sup>Department of Nursing, College of Health Science, Debre Berhan University, Ethiopia  
15

16  
17 <sup>2</sup>Department of Nursing, College of Health Science, Debre Markos University, Ethiopia  
18

19  
20 <sup>3</sup>Department of Midwifery, College of Health Science, Debre Markos University  
21

22  
23 <sup>4</sup>Department of Nursing, College of Health Science, Woldia University, Ethiopia  
24

25  
26 <sup>5</sup>College of Nursing, University of Saskatchewan, Canada; Academics without Borders  
27

28 **\*Corresponding author**

29 Wondimeneh Shibabaw Shiferaw

30 Address: P.O. Box 445, Debre Berhan University, Ethiopia

31 Email: [wshibabaw2015@gmail.com](mailto:wshibabaw2015@gmail.com)  
32  
33  
34  
35  
36  
37  
38  
39  
40  
41  
42  
43  
44  
45  
46  
47  
48  
49  
50  
51  
52  
53  
54  
55  
56  
57  
58  
59  
60

## Abstract

**Background:** Globally, Type 2 diabetes has continued to increase, now accounting for over 90% of all diabetes cases. Though the magnitude of uncontrolled glycaemic levels in patients with Type 2 diabetes is steadily rising, evidence showed that effectively controlled glycaemic levels can prevent complications and improve the quality of life of these patients. As little is known about the effect of educational interventions on this population, this systematic review and meta-analysis evaluated the effectiveness of educational interventions versus standard care on glycaemic control and disease knowledge among Type 2 diabetes patients.

**Methods:** PubMed, Google Scholar, Cochrane Library, Scopus, African Journals Online, and Wiley Online Library were searched. Two authors independently assessed within trial risk of bias in each included study using revised Cochrane risk-of-bias tool for randomized trials (RoB 2). A random-effects model was employed to estimate combined effect sizes. Subgroup analyses were employed to investigate possible sources of heterogeneity between studies. The overall certainty of the evidence was evaluated using the Grading of Recommendations Assessment, Development, and Evaluation (GRADE) approach.

**Results:** A total of 19 trials with 2,708 study participants were included in the review. Primary outcomes (glycaemic control) were reported in eighteen trials. The pooled estimated impact of educational intervention on glycaemic levels using the random effect model was -0.83 (95% CI: -1.17, -0.49,  $p < 0.001$ ). Subgroup analyses revealed greater A1C reductions in those studies with intervention durations of up to three months and with empirical intervention designs. Educational interventions led to significant increases in participants' knowledge of Type 2 diabetes (SMD: 1.16; 95% CI: 0.71, 1.60;  $I^2 = 93\%$ ).

**Conclusion:** In the current review overall, educational interventions can potentially lead to improved glycaemic control levels in patients with Type 2 diabetes despite heterogeneity across the studies. Besides, the findings showed that educational interventions could increase disease knowledge among Type 2 diabetes patients.

**PROSPERO registration** number CRD42020205838.

1  
2  
3 **Keywords:** educational intervention, Type 2 diabetes (T2DM), diabetes knowledge, glycaemic  
4 control  
5

### 6 7 **Strengths and limitations of this study** 8

- 9
- 10 ➤ This systematic review will provide a comprehensive search of the literature the effect of  
11 educational intervention on glycaemic control and knowledge of Type 2 diabetes.  
12
  - 13 ➤ An extensive search of multiple databases and search engines (i.e., PubMed, African  
14 Journals Online, Web of Science, Scopus, and Google Scholar) were performed to ensure  
15 a comprehensive review; nevertheless, potentially relevant articles from other/additional  
16 databases may be missed.  
17
  - 18 ➤ We only used English language articles. although our target was global, which could be  
19 in several other languages such as Spanish, French, or Portuguese.  
20  
21  
22  
23  
24

### 25 **Background** 26

27  
28 Diabetes mellitus (DM) is increasingly becoming an extensive non-communicable health  
29 problem, leading to significant morbidity and mortality [1]. Globally, a recent estimate showed  
30 that approximately 422 million adults living with DM [2]. According to International Diabetes  
31 Federation (IDF) projection approximately 629 million peoples will be affected by 2045 [3]. Of  
32 these, approximately 80% of affected individuals live in low-income countries [4]. In particular,  
33 Type 2 diabetes (T2DM) is responsible for more than 90% of all diabetes cases [5]. The  
34 increasing burden is due to several risk factors such as sedentary behaviors, obesity, unhealthy  
35 diet, lack of exercise, family history, and age [6-8].  
36  
37

38  
39 Maintaining optimal glycaemic levels is vital to diabetes control [9]. However, evidence showed  
40 that poor glycaemic control ( $HbA1c \geq 7\%$ ) contributes to kidney failure, myocardial infarction,  
41 stroke, retinopathy, hypertension, increasing costs for patient care, and reduced quality of life  
42 [10-14]. The aims of T2DM management are to attain glycaemic targets, minimize adverse  
43 events, and prevent complications [15, 16]. Therefore, lifestyle modifications, such as diet and  
44 exercise, have been reported to reduce the complications of uncontrolled glycaemic levels in  
45 T2DM patients [17].  
46  
47  
48  
49  
50  
51  
52  
53  
54  
55  
56  
57  
58  
59  
60

Evidence has revealed that self-management education can reduce the glycaemic level by 30–80% [18]. Besides, diabetes education can improve glycaemic control, changing people's behaviors, promoting self-care, reducing complications, and progression of the disease [19-21]. Moreover, numerous studies suggest that diabetes educational interventions can increase knowledge of diabetes [22, 23], medication compliance [24], decreasing readmissions [25, 26], reducing length of stay and mortality rate [25], and improve glycaemic control [27, 28]. In addition, the American Diabetic Association (ADA) position statement provides the evidence and strategies for the provision of education and support services to all adults living with T2DM[29]. Moreover, the consensus report showed that there are 4 critical times to provide diabetic self-management education and support: (1) at diagnosis, (2) annually and/or when not meeting treatment targets, (3) when complicating factors develop, and (4) when transitions in life and care occur [30].

Though knowledge about diabetes has paramount benefit to patients' self-care management; insufficient diabetes knowledge is unfavorable to the patients' health due to most of the complications that arise can be prevented through self-care practice [31, 32]. However, numerous studies have shown that improving patient knowledge about T2DM and its complications has substantial benefits to maintain optimal glycaemic levels, enhance treatment adherence, reduces treatment cost, and decreases the progression of disease [33-35]. Previously, several reviews on the effect of self-management interventions for patients with T2DM exist[36-38]. However, most reviews included inadequate number of articles, did not address the effects of education on knowledge of diabetes, and included interventions which were poorly described. Thus, research is required to estimate the effects of educational interventions with sufficient methodological quality and substantive statistical analysis. Hence, the present review and meta-analysis aimed to evaluate the effect of educational interventions on glycaemic control and disease knowledge in patients with T2DM.

### Review questions

- ✚ Does a structured educational intervention increase diabetes knowledge in patients with T2DM?
- ✚ Does a structured diabetic educational intervention reduce HbA1c levels among T2DM patients?



## Methods

### Protocol and registration

Initially, PROSPERO was searched to confirm for other reviews on the effect of educational interventions on glycemic control and disease knowledge among patients with T2DM. But, no such reviews were identified. Thus, the protocol was registered on Prospero ([www.crd.york.ac.uk/PROSPERO/](http://www.crd.york.ac.uk/PROSPERO/)) as recommended by the Preferred Reporting Items for Systematic Review and Meta-Analysis (PRISMA) statement [39] with the number (CRD42020205838).

### Search strategy and data sources

We did a comprehensive systematic search to collect all relevant articles using the Peer Review of Electronic Search Strategies (PRESS) for systematic reviews [40]. The search was limited to studies published in peer-reviewed journals from January 2000 to August 2021 (as authors were interested in up-to-date data). The PRISMA guidelines were used to conduct and report the present review [39]. The literature was searched in PubMed, Scopus, Google Scholar, African Journals Online, Cochrane Library, and Wiley Online Library. The keywords used for the review included “educational”, “behavioral”, “knowledge”, “glycemic control”, “glycosylated hemoglobin”, “HbA1c”, “Type 2 diabetes mellitus”, “Type 2 diabetes”, and “T2DM”. Boolean operators like “AND” and “OR” were used to combine search terms. The MeSH terms employed in the PubMed search engine in various combinations are shown in Table 1. To access all articles on this topic, we manually review all references to reduce publication bias. Searches were performed in August 20, 2020. The search was restricted to full texts, human studies, and English language publications. In the present review, the Patient/Population (P); Intervention (I); Comparison (C); and Outcomes (O) question was as follows: are educational intervention (I) in people with T2DM (P), when compared to people who had not taken part in the educational intervention or had standard care (C), associated with improved glycemic control and disease knowledge (O)?.

**Table 1. PubMed search history**

| Search | Search terms                                                                                           | Hits    |
|--------|--------------------------------------------------------------------------------------------------------|---------|
| #1     | Type 2 diabetes[tw] OR Type 2 diabetes mellitus[tw] OR T2DM[tw] OR insulin non dependent diabetes [tw] | 199,276 |

|    |                                                                                                             |           |
|----|-------------------------------------------------------------------------------------------------------------|-----------|
| #2 | Education [tw] OR intervention [tw] OR behavioral intervention[tw] OR self-management [tw]                  | 1,587,693 |
| #3 | Glycemic control [tw] OR glycosylated hemoglobin[tw] OR HbA1c[tw]                                           | 65,114    |
| #4 | Knowledge [tw] OR behavioral outcomes[tw]                                                                   | 851,164   |
| #5 | #1 AND #2 AND #3 AND #4                                                                                     | 5,428     |
| #6 | #5; Limits: studies done with Humans, English language, full text, RCT, and publication year (2000 to 2020) | 496       |

## Eligibility criteria

### Types of Participants

This review takes into consideration studies that included adult patients ( $\geq 18$  years old) with T2DM in outpatient health settings, primary care settings, diabetic clinics, and hospitals within the catchment. Those articles focusing on or including children or those with T1DM were excluded from the review.

### Types of Interventions

The review considered any educational intervention provided to adult patients with T2DM in diabetic care settings receiving standard or routine care. Intervention could be provided by any health care provider, involved any medium (written, oral, video, and computer), delivered at the individual or group-level, focused on theory-based or empirical content, and of varying durations. Studies lacking an education intervention, unclear information respecting the intervention, and insufficient data on the main outcome variable were considered criteria for exclusion.

**The comparator** in this study was the delivery of the usual care/routine care for T2DM. Routine care refers to diabetes care that health care staff usually and normally provides in their daily care. Articles were excluded if they did not implement a comparison with routine care.

### Types of Studies

In the present review, studies were included if they were randomized controlled trials. Full text articles were included, whereas studies published with only abstract or unpublished data were excluded. Of note, nonrandomized controlled trials, quasi-experimental, before and after, cohort,

1  
2  
3 case-control, and cross-sectional studies were excluded because uncontrolled trials and  
4 observational studies lead to greater risk of biased estimates of effect size [41].  
5  
6

### 7 **Type of outcome**

8  
9 This review included the following outcome measures: glycemic control as the primary outcome  
10 of the meta-analysis, and knowledge of diabetes considered as the secondary outcome. A study  
11 was excluded if outcomes were not measured or data could not be extracted.  
12  
13  
14

### 15 **Study selection**

16  
17 After database exploration, all recognized studies were uploaded into EndNote version 8, and  
18 duplicates articles were removed. Predefined selection criteria were used to select relevant full-  
19 text articles during the screening process. Three authors (WSS, PMP & YAA) independently  
20 screened the title, abstract, and keywords of the studies identified for possible eligibility in the  
21 review. Afterward, all full-text articles were evaluated carefully for inclusion and data extraction.  
22 Further screening of full text was done by two (TYA & YAA) independent authors to select the  
23 studies which satisfied the eligibility standards. The possible justification for the exclusion of  
24 full-text studies was documented and reported in the systematic review. Any uncertainties about  
25 study eligibility were discussed between authors.  
26  
27  
28  
29  
30  
31  
32  
33

### 34 **Data extraction**

35  
36  
37 After identifying studies for eligibility, data abstraction was conducted by two (AMK & WSS)  
38 independently authors using Microsoft™ Excel for Windows. The first author undertook the data  
39 abstraction, whereas the second author assumed control for the quality of extracted and entered  
40 data. The data extracted from each study included first/corresponding author, year of publication,  
41 study setting, education provider, duration of intervention, intensity of intervention, components  
42 of the intervention, number of participants in each arm (intervention and standard care group),  
43 intervention design, outcome measures, before and after intervention HBA1c levels, and  
44 knowledge scores. The outcome measures in this review were reported as the variation from  
45 starting point to closing date of follow-up in the intervention and standard care groups. If the  
46 standard deviation (SD) of mean difference was not reported in an included study, the values  
47 were recalculated according to the guideline in the Cochrane Handbook [42].  
48  
49  
50  
51  
52  
53  
54  
55  
56  
57

### Assessment of risk of bias in included studies

Two (MD & PMP) independently authors assessed within trial risk of bias in each included study using revised Cochrane risk-of-bias tool for randomized trials (RoB 2)[43]. The Cochrane's Risk of Bias tool evaluation domains used to evaluate validity and bias in studies of clinical trials were applied regarding randomisation, allocation sequence concealment, blinding, incomplete outcome data, selective outcome reporting, and other biases. For this review, the overall risk of bias was rated as High/Low/Some Concerns, in agreement with the RoB 2 tool. Any disagreement was resolved through discussion and consensus.

### Assessment of certainty of the evidence

To evaluate the quality of the evidence, the authors used the Grading of Recommendations Assessment, Development, and Evaluation (GRADE) approach[44]. GRADE pro-GDT was employed to summarize the quality of evidence [45]. The certainty of the evidence encompasses consideration of the within-study risk of bias which comprising methodological worth, indirectness of evidence, unexplained heterogeneity, imprecision, and probability of publication bias. The GRADE approach has four levels of quality such as high-quality evidence recommends that additional study is very unlikely to change our confidence in the estimate of effect size; moderate-quality reflects further research as likely to have a vital impact on the estimate of effect size and may alter the estimate; low quality reveals that further research is very unlikely to have a significant influence on the current estimate of effect size and is likely to change the estimate; and very low quality suggests one is precise indeterminate about the estimate.

### Data synthesis and analysis

The primary and secondary outcomes were reported as mean difference (MD) and standardized mean difference (SMD) with a 95% confidence interval (CI), using a random-effects model [46] respectively. Degree heterogeneity was examined with the  $I^2$  statistic, which expresses the amount of heterogeneity between studies [47]. To interpreting the effect sizes, authors followed Cohen's guidelines where  $d \leq 0.2$  was small,  $d \approx 0.5$  was medium, and  $d > 0.8$  was large variation among intervention and control groups [48]. We performed subgroup analyses to reduced the level of heterogeneity for the primary outcomes using duration of intervention and intervention design. Publication bias was visually evaluated using the funnel plot, supplemented by Egger's regression test [49, 50]. Sensitivity analysis was performed due to the high degree

heterogeneity and risk of bias. Review Manager of the Cochrane Collaboration (RevMan 5.4, Cochrane Organization) was used to perform the meta-analysis.

## Patient and public involvement

Patients and/or the public were not involved in the design, or conduct, or reporting, or dissemination plans of this research.

## Results

### Selection of studies

The search of the six databases yielded 1,183 articles, and 4 articles were retrieved manually through a review of reference lists. After eliminating duplicates, 457 articles remained. Three hundred seventy-two studies were removed after reading the abstract and title, leaving 85 articles for full screening. Following 66 exclusions at the full-text level (mainly due to nonrandomized control trials (n = 34), or reporting mixed population (Type 1 and Type 2 diabetes) (N= 7)) 19 studies were incorporated in the final review. The flow diagram for study selection is shown in Figure 1.

### Characteristics of the included studies

In the current meta-analysis a total of 19 articles met the inclusion criteria with 2,708 study participants. Of these 9 included articles reported glycemic control and knowledge of diabetes as a common outcome variable. Regarding location, two were from Brazil [51, 52], three from China [53-55], two from Germany [56, 57], five from Iran [58-62], two from Malaysia [63, 64], two from Sweden [65, 66], and one each from Thailand [67], Sri Lanka [68], and Australia [69]. The sample size varied from 60 [53] to 300 participants [55]. Educational interventions in the review was guided by the following theories or models; three studies used the theory of self-efficacy [54, 63, 67], three studies [56, 61, 66] used empowerment theory, two studies [60, 68] used theory of self-efficacy and motivational interviewing, and one study used either chronic care model [55], Precede-Proceed model [62], BASNEF Model [59], or behavioral theory [64]. However, the remainder of the articles [51-53, 57, 58, 65, 69] used non-theory or model based approaches.

1  
2  
3 The educational interventions were comprised of face-to-face counseling [54, 55, 63, 68, 69],  
4 diabetes education sessions [51, 52, 55, 60, 63, 67], group discussion [56, 58-60, 67], telephone  
5 follow-ups [54, 60, 63, 67, 69], home visits [67], demonstrations [53, 54, 59], as well as  
6 questions and responses [58, 59] were among the most common approaches. The control groups  
7 of all studies were the current standard of care. The duration of educational interventions varied  
8 from 4 weeks [54, 58, 59] to 12 months [52, 66]. Interventionl groups obtained the information  
9 by different health care professionals such as physicians [54, 55, 66], nurses [52, 56, 58, 67, 69],  
10 nutritionists [61, 64], health managers [55], public health assistants [55], and pharmacists [51]. In  
11 most included studies, intervention processes were group based education [52, 54-63, 65-67],  
12 combined education [53, 68, 69]; however, in the remainder, web-based [64] and individual-  
13 based [51] education approaches were used. The main results and features of the selected studies  
14 are presented in Table 2.  
15  
16  
17  
18  
19  
20  
21  
22  
23  
24  
25  
26  
27  
28  
29  
30  
31  
32  
33  
34  
35  
36  
37  
38  
39  
40  
41  
42  
43  
44  
45  
46  
47  
48  
49  
50  
51  
52  
53  
54  
55  
56  
57  
58  
59  
60

Table 2. Characteristics of the included studies

| Authors            | Country   | No of subjects (baseline) | Health education provider | Theory/ model used | Group/ Individual | Intervention                                                                                                                                                  | Components of intervention                                                                                                                                                                                                                                        | Duration of intervention | Outcome measures                             | Outcome indicators |
|--------------------|-----------|---------------------------|---------------------------|--------------------|-------------------|---------------------------------------------------------------------------------------------------------------------------------------------------------------|-------------------------------------------------------------------------------------------------------------------------------------------------------------------------------------------------------------------------------------------------------------------|--------------------------|----------------------------------------------|--------------------|
| Wichit et al [67]  | Thailand  | I=70<br>C=70              | Trained Nurse             | Self-efficacy      | Group             | Education classes (3 session), discussions, a home visit, and a telephone follow-up                                                                           | Program focus on; meal planning, foot hygiene, physical activities, problem solving, diabetes-related complications, enhancing competence, and diabetes knowledge                                                                                                 | 9 week                   | at baseline, week 5, and week 13             | ①②<br>④⑤<br>⑥      |
| Fan et al, [69]    | Australia | I=138<br>C=138            | Trained Nurse             | Empirical          | Mixed             | Face-to-face counseling over 1 h, and self-care plan, a 10-min telephone before the appointment, attend a 3-monthly forum about 2 h.                          | Education emphasizes on such as diet modification, exercise, SMBG, psychological and adherence to medication                                                                                                                                                      | 6 months                 | At each follow-up and the end of the 6-month | ①                  |
| Grillo et al, [52] | Brazil    | I=68<br>C=68              | Trained generalist nurse  | Empirical          | Group             | Structured diabetes self-management education, the course consisted of weekly 2-hour meetings for 5 weeks, reinforcement meetings every 4 months (7 sessions) | The course content included (1) identification of modifiable risk factors for T2DM, (2) non-pharmacological treatment, emphasizing diet and exercise, (3) pharmacological therapy, (4) an overview of chronic diabetes complications, and (5) foot care.          | 12 months                | At baseline, 4, 8, and 12 months             | ①④                 |
| Cani et al, [51]   | Brazil    | I= 37<br>C= 41            | Pharmacist                | Empirical          | Individual        | Diabetes education (5 sessions), pharmacotherapeutic care plan, and written guidance                                                                          | Education on acute and chronic complications, the importance of lifestyle changes, foot care, the importance of home blood glucose monitoring and other topics, advice focused on the indication, proper dosage, side effects and adequate storage of medication, | 6-month                  | At baseline and 6 months                     | ①③<br>④⑥           |
| Zheng et al, [53]  | China     | I=30<br>C=30              | Therapist guidance        | Empirical          | Mixed             | Two-session diabetes self-management education which is theory and practical course, lecture, video, exercise, food simulation model, and vivid models        | Theory course focuses on knowledge of diabetes and self-management strategies, such as diet guidance, exercise guidance, and knowledge of hypoglycemia treatment, foot care, medication, and blood glucose                                                        | 3 months                 | At baseline and 3 months                     | ①③<br>⑤            |

1  
2  
3  
4  
5  
6  
7  
8  
9  
10  
11  
12  
13  
14  
15  
16  
17  
18  
19  
20  
21  
22  
23  
24  
25  
26  
27  
28  
29  
30  
31  
32  
33  
34  
35  
36  
37  
38  
39  
40  
41  
42  
43  
44  
45  
46  
47

|                       |         |                |                                                        |                                      |       |                                                                                                                                                                                                                |                                                                                                                                                                                                                  |          |                                                              |                |
|-----------------------|---------|----------------|--------------------------------------------------------|--------------------------------------|-------|----------------------------------------------------------------------------------------------------------------------------------------------------------------------------------------------------------------|------------------------------------------------------------------------------------------------------------------------------------------------------------------------------------------------------------------|----------|--------------------------------------------------------------|----------------|
|                       |         |                |                                                        |                                      |       |                                                                                                                                                                                                                | monitoring. The practice course focus on one-on-one nutrition guidance and individualized exercise guidance.                                                                                                     |          |                                                              |                |
| Jiang et al, [54]     | China   | I=133<br>C=132 | Trained nurses and physicians                          | Self-efficacy                        | Group | Structured education program, patients' experience sharing, peer modeling, demonstration, the intervention was given four weekly sessions for 1 month and then face-to-face/telephone meetings every 3 months. | Diabetes-related knowledge and diabetes self-management skills based on self-efficacy theory.                                                                                                                    | 4 weeks  | At baseline, 3- and 6-month                                  | ①②<br>③④<br>⑤  |
| Kong et al, [55]      | China   | I=150<br>C=150 | Physician, health manager, and public health assistant | Chronic Care Model                   | Group | Pamphlets and face-to-face communication, continuous medical education, education was 9 session every month.                                                                                                   | Received the five components CCM (chronic care model)-based intervention, awareness of the chronic disease management, Self-management support included goals setting, planning, doing, checking, and assessing, | 9 months | At baseline, & 9 months                                      | ①③<br>⑥        |
| Braunet al, [57]      | Germany | I=83<br>C=72   | Not stated                                             | Empirical                            | Group | Diabetes teaching and treatment program, seven educational classes of 45 min duration,                                                                                                                         | Self-monitoring, Diabetes treatment,                                                                                                                                                                             | 6 months | Before (t0), immediately after (t1), and 6 months after (t2) | ①④<br>⑤        |
| Hermanns et al [56]   | Germany | I=92<br>C=92   | Certified diabetes nurse                               | Empowerment self-management approach | Group | Lecture, discussion, and a nutrition game, the education is given for 10 lessons of 90 min each, 5-week period, two sessions per week.                                                                         | Lifestyle modification, blood glucose self-monitoring, metabolic risk factors, individual goals of diabetes treatment, Nutrition game, Physical exercise, and complications                                      | 5-weeks  | At baseline, and 6 months after the intervention             | ①②<br>③④<br>⑤⑥ |
| Didarloo A et al [58] | Iran    | I=45<br>C=45   | Trained nurse                                          | Empirical                            | Group | Interactive approach such as discussion, brainstorming, question and response techniques for 60 min/week for 4 weeks, utilized                                                                                 | Promoting self-efficacy of diabetics, the educator utilized specific training approaches such as verbal persuasion, modeling,                                                                                    | 4 weeks  | At baseline, and 3 months                                    | ①②<br>③④<br>⑥  |



1  
2  
3  
4  
5  
6  
7  
8  
9  
10  
11  
12  
13  
14  
15  
16  
17  
18  
19  
20  
21  
22  
23  
24  
25  
26  
27  
28  
29  
30  
31  
32  
33  
34  
35  
36  
37  
38  
39  
40  
41  
42  
43  
44  
45  
46  
47

|                         |          |              |                                                  |                                             |       |                                                                                                                                                                                         |                                                                                                                                                                                              |          |                                                              |               |
|-------------------------|----------|--------------|--------------------------------------------------|---------------------------------------------|-------|-----------------------------------------------------------------------------------------------------------------------------------------------------------------------------------------|----------------------------------------------------------------------------------------------------------------------------------------------------------------------------------------------|----------|--------------------------------------------------------------|---------------|
|                         |          |              |                                                  |                                             |       | specific training such as verbal persuasion, and modeling                                                                                                                               | and performance accomplishments. Definition, signs, symptoms, and consequences of T2DM, and diet                                                                                             |          | after the end of the intervention                            |               |
| Askari[59]              | Iran     | I=54<br>C=54 | Researcher                                       | BASNEF Model                                | Group | Training in eight sessions (two sessions in a week); each session lasted for 70 min, question and answer, exercise, discussion, image, and messages were sent to the patients each week | Presented content was about diabetes, sign & symptoms, diet, food composition tables, partitioning, proper use of fruits, vegetables, and grains as sources of dietary fiber.                | 4 week   | At baseline, and 3 months after the end of the intervention. | ①②<br>③④<br>⑤ |
| Ebrahimi et al [61]     | Iran     | I=53<br>C=53 | Nurse with the endocrinologist, and nutritionist | Empowerment model                           | Group | Education training, 5–7 weekly regular meetings were held about 60–90 min.                                                                                                              | The content of education was diet, exercise, medication, and foot care. The structural model was perceived threat, self-efficacy, and evaluation                                             | 8 weeks  | Baseline, and 3 months after the end of the intervention     | ①             |
| Nejhaddadgar et al [62] | Iran     | I=43<br>C=43 | Trained professional                             | Precede-proceed model                       | Group | The education program with eight weekly sessions, training workshops were also conducted among patients' families and health workers.                                                   | Education based on the variables of the PRECEDE Model such as predisposing factors are genetic and environmental factors such as knowledge, attitudes, and self-efficacy                     | 8 weeks  | Baseline and 6 months after the education program            | ②③<br>④⑤      |
| Azami et al, [60]       | Iran     | I=71<br>C=71 | Trained nurse                                    | Self-efficacy and Motivational Interviewing | Group | Usual care plus a 12-week nurse-led diabetes self-management education, booklet, watching movie clips, group-based educational session, Telephone follow-up Calls                       | Self-care behaviors, including healthy eating, being active, monitoring, taking medication, problem solving, reducing risk, and healthy coping, are the core components of the intervention. | 12 weeks | At baseline and 12-week and 24-week post-randomization       | ①②<br>⑤⑥      |
| Tan et al, [63]         | Malaysia | I=82<br>C=82 | Not stated                                       | Self-efficacy                               | Group | Structured education consisted of monthly sessions for 3 months                                                                                                                         | The first session, healthy eating, being active, medication adherence and                                                                                                                    | 3 months | At baseline,                                                 | ①②<br>④       |

1  
2

|                                                         |                        |           |               |                                               |                                             |                                                                                                                                                 |                                                                                                                                                                                  |                                                                                                                                                                                                                                                                                                |              |                                                                |          |
|---------------------------------------------------------|------------------------|-----------|---------------|-----------------------------------------------|---------------------------------------------|-------------------------------------------------------------------------------------------------------------------------------------------------|----------------------------------------------------------------------------------------------------------------------------------------------------------------------------------|------------------------------------------------------------------------------------------------------------------------------------------------------------------------------------------------------------------------------------------------------------------------------------------------|--------------|----------------------------------------------------------------|----------|
|                                                         |                        |           |               |                                               |                                             | about 30 min each session, two were face-to-face individual education sessions and one was a telephone follow-up, Printed educational materials | Self-monitoring of blood glucose. 2 <sup>nd</sup> and 3 <sup>rd</sup> session on problem-solving skills related to hyperglycemia, hypoglycemia, sick day, and emotional episodes |                                                                                                                                                                                                                                                                                                | and 12 weeks |                                                                |          |
| 9<br>10<br>11<br>12<br>13<br>14<br>15<br>16<br>17<br>18 | Ramadas [64]           | Malaysia  | I=66<br>C=62  | Nutritionist                                  | Behavioral theory                           | Web-based                                                                                                                                       | Web-based dietary intervention, 12 lesson plans were made available to the patients one after another for 6 months with updates every fortnight                                  | The dietary lesson plans in the intervention package were personalized according to the patients' dietary stages of change and were expected to improve their diabetes, knowledge, Attitude, and behavior, the participants also send their queries to the study nutritionist via the website. | 6-months     | At baseline, 6-month post-intervention and 12-months follow-up | ①②<br>③④ |
| 19<br>20<br>21<br>22<br>23<br>24                        | Adolfsson, [66]        | Sweden    | I=50<br>C=51  | Nurse and physician                           | Empowerment                                 | Group                                                                                                                                           | Empowerment group education, counseling using videotaping, presentation and discussion, one follow-up session has given within 7 months.                                         | About the disease, treatment, prevention of complications, blood glucose monitoring, diet, physical activity, and daily foot care.                                                                                                                                                             | 12 months    | at baseline and at 1-year follow-up                            | ①②<br>④⑥ |
| 25<br>26<br>27<br>28<br>29                              | Hörnsten, [65]         | Sweden    | I=44<br>C= 60 | Nurse with special education in diabetes care | Empirical                                   | Group                                                                                                                                           | Education and group discussion with ten two hour group sessions over 9 months                                                                                                    | Patients' understanding of the illness.                                                                                                                                                                                                                                                        | 9 months     | Before and each year after the intervention                    | ①        |
| 30<br>31<br>32<br>33<br>34<br>35<br>36                  | Jayasuriya et al, [68] | Sri Lanka | I=43<br>C=42  | Medical officer and trained nurse             | Self-efficacy and motivational interviewing | Mixed                                                                                                                                           | Self-management education through face to face meeting and lecturing, The first four sessions within six weeks, following monthly (4 weekly) for five more visits.               | Physical activity and healthy Dietary intake and more recently in "avoidance behaviors" to reduce unhealthy eating                                                                                                                                                                             | 6 months     | At baseline and at 6 months                                    | ①②<br>⑤  |

37

Notes: Outcome indicators: ①metabolic controls, ②self-efficacy, ③behavior, ④knowledge, ⑤other psychological indicators, and ⑥quality of life.

38

39

40

41

42

43

44

45

46

47

### **Risk of bias in the included studies**

The random sequence generation for allocation was evaluated as low risk of bias in 12 studies [52-54, 56, 57, 60, 61, 63, 64, 66-68] with seven studies were measured as having some concerns of bias [51, 55, 58, 59, 62, 65, 69]. Allocation concealment was a low risk of bias in five studies [53, 54, 58, 60, 67]. On the other hand, a high risk of allocation bias was reported in one study [59]. The remaining studies [51, 52, 55-57, 61-66, 68, 69] were evaluated to have some concerns of bias. Blinding of participants and educators was considered a problem in such interventions; however, one study blinded participants and educators [60]. Outcome assessors were blinded in three studies [52, 61, 67]. Regarding incomplete outcome data reporting seven studies [51, 52, 54, 58, 60, 67, 69] were evaluated as low risk of bias. The risk of bias due to selective reporting was confirmed low for 16 studies [51, 53-63, 65, 67-69]; however, some concerns of bias in three studies [52, 64, 66]. Nine studies [52-54, 56, 60, 64, 66, 67, 69] were evaluated as low risk of other potential biases, two studies [58, 65] were confirmed to be high risk for bias, and eight studies [51, 55, 57, 60-63, 68] were evaluated to have some concerns of bias. The risk of bias for studies overall is summarized in Figure 2 and the risk of bias in each study is reported in Figure 3.

### **Effect of educational intervention on glycemic control**

The effects of educational interventions on glycemic (HbA1C) level reduction are presented in Figure 4. The results of the meta-analysis using random-effect model revealed that educational interventions significantly decreased HbA1c levels (MD: -0.83%; 95% CI: -1.17, -0.49;  $P < 0.001$ ,  $I^2=88\%$ ) compared to standard care groups. A sensitivity analysis was employed by omitting three studies [53, 56, 58] because of high risk of heterogeneity. When these studies were omitted, the results demonstrated that the pooled effect on HbA1c reduction remained statistically significant with an MD of -0.70% (95% CI: -0.96%, -0.44%,  $p = 0.001$ ). The  $I^2$  statistics among the studies was 73%, indicating a moderate risk of heterogeneity.

### Subgroup analysis

In the present review subgroup analysis was conducted based on the duration of intervention and intervention design (theory-based versus empirical approach) to explore the potential source of heterogeneity between trials. The results of the subgroup analysis showed that the greater effect size was reported in studies with an intervention duration of  $\leq 3$  months (MD: -1.09, 95% CI: -1.60, -0.57,  $p < 0.00$ ) with a significant evidence of heterogeneity among studies ( $I^2 = 88\%$ ) (Fig. 5). Additionally, the results of the subgroup analysis revealed that interventions with an empirical approach had greater effects in terms of reducing glycemic levels (MD: -1.03, 95% CI: -1.90, -0.15,  $p < 0.00$ ). Because of a significant degree of heterogeneity between studies ( $I^2 = 88\%$ ) random effect analysis was used (Figure 6).

### The effect of educational interventions on diabetes knowledge

Ten out of the 19 studies reported knowledge of diabetes as an outcome variable [51, 52, 54, 56-59, 62, 64, 67]. The pooled effect size of the ten trials demonstrated an improvement in knowledge of T2DM (SMD: 1.16, 95% CI: 0.7, 1.60,  $p < 0.001$ ; Fig.7) compared to standard care groups. A random-effect model was used because of significant heterogeneity. The Dietary Knowledge Questionnaire [64] and the Diabetes and Medication Knowledge Questionnaire [52, 54, 57, 58, 67] were used to estimate the level knowledge in individuals with T2DM. The number of items was between eight [62] and 24 items [67]. There was a significant variation in knowledge of T2DM scores across different studies.

### Publication bias

The presence of publication bias was visually evaluated using a funnel plot for the primary outcome (glycemic control), and the results also reported there was no publication bias (Figure 8). Likewise, Egger's test also showed no publication bias ( $P = 0.732$ ). On the other hand, there was insufficient data to generate funnel plots to assess for the potential presence of publication bias for the second outcome (knowledge about T2DM).

### **Overall quality of the evidence**

The overall quality of evidence was assessed using the GRADE approach and the results are presented in the summary of findings for the main comparison. Findings showed that the overall certainty of the evidence for glycemic control was moderate, which suggests further studies will increase our confidence in the estimate of effect size. The quality of evidence for diabetes knowledge was low, which reflects that the effect size is limited and the true effect may be substantially different from the estimate of the effect size (Table 3).

**Table 3.** GRADEpro level of quality evidences assessment**[educational intervention] compared to [usual care] for [Type 2 diabetes patients]**

Patient or population: [patients with Type 2 diabetes ]

Setting:

Intervention: [educational interventions]

Comparison: [usual care]

| Outcomes                                                                                                                      | Anticipated absolute effects* (95% CI) |                                                       | Relative effect (95% CI) | No of participants (studies) | Certainty of the evidence (GRADE) | Comments                                                                                                                                                                                                                                                                                                                                                                                   |
|-------------------------------------------------------------------------------------------------------------------------------|----------------------------------------|-------------------------------------------------------|--------------------------|------------------------------|-----------------------------------|--------------------------------------------------------------------------------------------------------------------------------------------------------------------------------------------------------------------------------------------------------------------------------------------------------------------------------------------------------------------------------------------|
|                                                                                                                               | Risk with [comparison]                 | Risk with [intervention]                              |                          |                              |                                   |                                                                                                                                                                                                                                                                                                                                                                                            |
| glycemic control (HbA1c) measured with: difference in mean HbA1c level after intervention<br>Scale from: 1 month to 12 months | -                                      | MD <b>0.83 lower</b> (1.17 lower to 0.49 lower)       | -                        | 2474 (19 RCTs)               | ⊕⊕⊕○<br>MODERATE <sub>a,b</sub>   | a. majority of studies had high or unclear risks of bias for allocation concealment and blinding of participants or investigators. One out of two studies reported low risk methods for blinding of outcome assessment.<br><br>b. The certainty in the evidence was downgraded due to imprecision in the intervention, inconsistent with duration of intervention and intervention design. |
| diabetes knowledge assessed with: diabetes and medication knowledge<br>Scale from: 1 month to 12 months                       | -                                      | SMD <b>1.16 SD higher</b> (0.71 higher to 1.6 higher) | -                        | 1309 (10 RCTs)               | ⊕⊕○○<br>LOW <sub>c,d</sub>        | c. Bias was judged to be at ' ' high risk' in this trial.<br><br>d. Heterogeneity was high in this trial.                                                                                                                                                                                                                                                                                  |

\*The risk in the intervention group (and its 95% confidence interval) is based on the assumed risk in the comparison group and the relative effect of the intervention (and its 95% CI).

CI: Confidence interval; MD: Mean difference; SMD: Standardized mean difference

**GRADE Working Group grades of evidence**

**High certainty:** We are very confident that the true effect lies close to that of the estimate of the effect

**Moderate certainty:** We are moderately confident in the effect estimate: The true effect is likely to be close to the estimate of the effect, but there is a possibility that it is substantially different

**Low certainty:** Our confidence in the effect estimate is limited: The true effect may be substantially different from the estimate of the effect

**Very low certainty:** We have very little confidence in the effect estimate: The true effect is likely to be substantially different from the estimate of effect

## Discussion

Currently diabetes has emerged as a public health problem that needs effective educational interventions which apply across age, ethnicities, and socioeconomic levels. Evidence showed that appropriate self-management education is a vital component of clinical care to improve glycemic levels and change behavioral outcomes [70]. In the current meta-analysis to generate high quality evidence, only clinical trials studies were included.

This review summarises 19 RCT studies of educational interventions involving 2,708 study participants with T2DM that took place in different global regions and health systems. In the present meta-analysis, findings demonstrated that educational intervention has a promising effect on glycemic control and diabetes knowledge. The finding revealed that educational interventions reduced HbA1c levels by 0.83% (95% CI: 1.17 %, 0.49%) among T2DM patients. This finding has a substantial degree heterogeneity ( $I^2 = 88\%$ ) indicating variation between included studies. However, there was a slight reduction of mean difference after sensitivity analysis, 0.70% (95% CI: 0.96 %, 0.44%), with a moderate degree of heterogeneity ( $I^2=73\%$ ). Our findings are supported by previous meta-analyses, which reported that behavioral and self-management education have a significant benefit in the reduction of HbA1c levels in patients with diabetes [28, 37, 38].

The improvement in glycemic levels is considered to be clinically essential. The UK Diabetes Study revealed that with each 1% reduction in HbA1c there is a likelihood to reduce the risk of diabetes complications by 21% [71]. Similarly, a previous study showed that achieving optimal glycemic level is likely to reduce the risk of deaths from diabetes complications, such as cardiovascular and cerebrovascular problems [72]. Moreover, the American Diabetes Association recognizes that diabetes self-management has a vital role to improve glycemic levels and reduce diabetes related complications [73].

In the current meta-analysis, subgroup analysis was conducted based on the duration of the educational interventions. Concerning duration of interventions, there was a variation between < 3 months, 3-6 months, and > 6 months to the reduction of HbA1c levels. In this meta-analysis, the pooled effect size for short educational interventions (duration  $\leq$  3-month) was better than the

1  
2  
3 effect size of longer interventions (duration 3-6 month and >6-month)  $-1.09$  (95% CI;  $-1.60, -$   
4  $0.57$ ,  $P < 0.001$ ). One possible explanation maybe associated with the initial motivation of the  
5 participant to be empowered to obtain positive results in a short period [74]. In contrast, previous  
6 studies reported that longer durations of interventions were more likely related with a significant  
7 reduction in HbA1c levels [28, 75, 76]. Similarly, a meta-analysis study showed that more  
8 contact hours were associated with a reduction of HbA1c level [33]. Moreover, evidence also  
9 supported that the duration of contact hours between trainer and patient has a substantial impact  
10 on glycated hemoglobin levels [18]. The current findings reflects that the duration of intervention  
11 would influence the effectiveness of the educational intervention among T2DM patients.  
12 Therefore, this disparity should be considered when developing future education interventions.  
13  
14  
15  
16  
17  
18  
19  
20

21 In the present review subgroup analysis was conducted based on interventions design (theory-  
22 based versus empirical educational). Our study indicated that educational interventions benefited  
23 all patients regardless of the intervention design. In the current findings, empirical educational  
24 intervention showed improvement in glycemic control level  $-1.03$  (95% CI;  $-1.90, -0.15$ ,  $P <$   
25  $0.001$ ). Similarly, evidence showed that interactive self-management interventions through  
26 evidence-based approaches and structured curricula is crucial to improve glycemic control and  
27 behavioral outcomes [77]. However, another review indicates that, in patients with T2DM,  
28 theory-based self-management educational interventions improved HbA1c [36]. Although one-  
29 third of the included studies used an empirical approach in designing interventions, and favorable  
30 results on glycemic control were obtained, their specific role in educational interventions has  
31 been debated.  
32  
33  
34  
35  
36  
37  
38  
39  
40

41 In this review, diabetes knowledge showed significantly a higher standardized mean score of  
42 correct knowledge of diabetes among the intervention group as compared to the standard care  
43 group (SMD =  $1.16$ ; 95%CI:  $0.71, 1.60$ ,  $p < 0.001$ ). Similarly, educational interventions were  
44 associated with significant improvements in knowledge of diabetes being reported in the  
45 previous meta-analyses [78, 79]. Moreover, there is evidence that education improves knowledge  
46 and subsequently promotes behavioral changes among patients with end-stage renal disease [80].  
47 Though significant changes were observed in diabetes knowledge, this finding should be  
48 interpreted with caution due to the significant degree of heterogeneity among included studies.  
49  
50  
51  
52  
53  
54  
55  
56  
57  
58  
59  
60



## Limitations

Our study has some limitations that need to be considered in the future. First, studies published in the English language were only considered for this systematic review. Second, there was variation in the included studies in terms of healthcare providers, component of interventions, outcome measures, and intervention methods. Third, global representativeness must be considered as it was not possible to identify evidence from all countries of the globe. Fourth, although all the included studies were randomized controlled trials, some trials had biases, such as lack of allocation concealment, blinding, and intention-to-treat analysis.

## Conclusion

This systematic review adds to the body of knowledge that suggests that structured Diabetic self management education and support (DSMES) contributes to improving glycemic outcomes and diabetes knowledge. Therefore, clinician could make an effort to provide such care to ensure glycemic control and to improve knowledge of T2DM. Further research is needed to determine the clinical significance of these improvements and their cost-effectiveness.

## Implications for practice

Overall, these data revealed that educational interventions provide a basic benchmark to reduce glycemic levels and to improve knowledge of T2DM. Importantly, to implement a successful education intervention, it is necessary to consider the duration of intervention and intervention design (empirical education is more effective) in patients with T2DM. Therefore, clinicians should use educational interventions to improve glycemic control and diabetes knowledge among T2DM patients. However, before making a practice decision based on the current review, further information from other reviews considering how the role of educational intervention reduced glycemic level and improved diabetes knowledge should be taken into account. Hence, the certainty of this evidence is not adequate to conclude that interventions will be effective among T2DM patients.

## Implications for research

Further research is likely to change the estimated effect size of educational interventions in glycemic control and knowledge of T2DM patients. Knowledge of diabetes was assessed using different tools, outcome data was measured in heterogeneous ways. Based on this review, future

1  
2  
3 studies of educational intervention would increase our certainty of evidence either these  
4 interventions improve knowledge of diabetes or not by overcome limitations of existing studies.  
5 Therefore, future educational interventions studies should be designed to evaluate individual  
6 centered outcomes and that are becoming new priorities to support in clinical decision-making.  
7  
8  
9

### 10 **List of abbreviations**

11  
12  
13 GRADE: Grading of Recommendations Assessment, Development, and Evaluation; HbA1c:  
14 glycosylated hemoglobin level; IDF: International Diabetes Federation; PRESS: Peer Review of  
15 Electronic Search Strategies; PRISMA: Preferred Reporting Items for Systematic Review and  
16 Meta-Analysis statement; T2DM: Type 2 diabetes mellitus; WHO: World Health Organization.  
17  
18  
19  
20

### 21 **Declaration**

#### 22 **Ethics approval and consent to participate**

23  
24 Not applicable.  
25  
26  
27

#### 28 **Consent for publication**

29  
30 Not applicable.  
31  
32

#### 33 **Availability of data and materials**

34  
35 All relevant data are within the paper and supporting information files. There is no separate data  
36 set to share.  
37  
38

#### 39 **Competing interests**

40  
41 The authors declare that they have no competing interests.  
42  
43

#### 44 **Funding**

45  
46 Not applicable.  
47  
48

#### 49 **Authors' contributions**

50  
51 WSS, YAA, and TYA developed the protocol and were involved in the design, selection of  
52 study, data extraction, statistical analysis, and developing the initial drafts of the manuscript.  
53  
54 AMK, WSS, PMP, and MD were involved in data extraction, quality assessment, statistical  
55  
56  
57

analysis, and revising. WSS and YAA prepared and edited the final draft of the manuscript. All authors read and approved the final draft of the manuscript.

## Acknowledgments

Not applicable

## References

1. Fan W: **Epidemiology in diabetes mellitus and cardiovascular disease.** *Cardiovascular endocrinology* 2017, **6**(1):8.
2. World Health organization GroD, Geneva, 2016. Accessed 30 August 2016.
3. Cho N, Shaw J, Karuranga S, Huang Y, da Rocha Fernandes J, Ohlrogge A, Malanda B: **IDF Diabetes Atlas: Global estimates of diabetes prevalence for 2017 and projections for 2045.** *Diabetes research and clinical practice* 2018, **138**:271-281.
4. International diabetes federation. *IDF Diabetes Atlas* teB, Belgium: International Diabetes Federation. 2015. .
5. Zheng Y, Ley SH, Hu FB: **Global aetiology and epidemiology of Type 2 diabetes mellitus and its complications.** *Nature Reviews Endocrinology* 2018, **14**(2):88.
6. Lyles CR, Grothaus L, Reid RJ, Sarkar U, Ralston JD: **Communication about diabetes risk factors during between-visit encounters.** *The American Journal of Managed Care* 2012, **18**(12):807-815.
7. Meng X-H, Huang Y-X, Rao D-P, Zhang Q, Liu Q: **Comparison of three data mining models for predicting diabetes or prediabetes by risk factors.** *The Kaohsiung journal of medical sciences* 2013, **29**(2):93-99.
8. Organization WH: **Global report on diabetes.** 2016.
9. Association AD: **6. Glycemic Targets: Standards of Medical Care in Diabetes-2020.** *Diabetes Care* 2020, **43**(Suppl 1):S66.
10. Gibbons CH, Goebel-Fabbri A: **Microvascular complications associated with rapid improvements in glycemic control in diabetes.** *Current diabetes reports* 2017, **17**(7):48.
11. Haghightapanah M, Nejad ASM, Haghightapanah M, Thunga G, Mallayasamy S: **Factors that correlate with poor glycemic control in Type 2 diabetes mellitus patients with complications.** *Osong public health and research perspectives* 2018, **9**(4):167.
12. Dutta T, Kudva YC, Persson X-MT, Schenck LA, Ford GC, Singh RJ, Carter R, Nair KS: **Impact of long-term poor and good glycemic control on metabolomics alterations in Type 1 diabetic people.** *The Journal of Clinical Endocrinology & Metabolism* 2016, **101**(3):1023-1033.
13. Lau C-Y, Qureshi A, Scott S: **Association between glycaemic control and quality of life in diabetes mellitus.** *Journal of postgraduate medicine* 2004, **50**(3):189.

14. Degli Esposti L, Saragoni S, Buda S, Sturani A, Degli Esposti E: **Glycemic control and diabetes-related health care costs in Type 2 diabetes; retrospective analysis based on clinical and administrative databases.** *ClinicoEconomics and outcomes research: CEOR* 2013, **5**:193.
15. Turnbull F, Abraira C, Anderson RJ, Byington R, Chalmers J, Duckworth W, Evans G, Gerstein H, Holman R, Moritz T: **Intensive glucose control and macrovascular outcomes in Type 2 diabetes.** In.: Springer; 2009.
16. Hemmingsen B, Lund SS, Gluud C, Vaag A, Almdal T, Hemmingsen C, Wetterslev J: **Intensive glycaemic control for patients with Type 2 diabetes: systematic review with meta-analysis and trial sequential analysis of randomised clinical trials.** *Bmj* 2011, **343**.
17. Sharifirad G, Najimi A, Hassanzadeh A, Azadbakht L: **Application of BASNEF educational model for nutritional education among elderly patients with type 2 diabetes: improving the glycemic control.** *Journal of research in medical sciences: the official journal of Isfahan University of Medical Sciences* 2011, **16**(9):1149.
18. Norris SL, Lau J, Smith SJ, Schmid CH, Engelgau MM: **Self-management education for adults with type 2 diabetes: a meta-analysis of the effect on glycemic control.** *Diabetes care* 2002, **25**(7):1159-1171.
19. Ellis SE ST, Dittus RS, Brown A, Pichert JW, Elasy TA. Diabetes patient education: a meta-analysis and meta-regression. *Patient education and counseling.* 2004 Jan 1;52(1):97-105.
20. Deakin TA MC, Cade JE, Williams R. Group based training for self-management strategies in people with type 2 diabetes mellitus. *Cochrane database of systematic reviews.* 2005(2).
21. Soundarya M, Asha A, Mohan V: **Role of a diabetes educator in the management of diabetes.** *International Journal of Diabetes in Developing Countries* 2004, **24**:65-68.
22. Berikai P, Meyer PM, Kazlauskaitė R, Savoy B, Kozik K, Fogelfeld L: **Gain in patients' knowledge of diabetes management targets is associated with better glycemic control.** *Diabetes care* 2007, **30**(6):1587-1589.
23. Hartz A, Kent S, James P, Xu Y, Kelly M, Daly J: **Factors that influence improvement for patients with poorly controlled type 2 diabetes.** *Diabetes research and clinical practice* 2006, **74**(3):227-232.
24. Rhee MK, Slocum W, Ziemer DC, Culler SD, Cook CB, El-Kebbi IM, Gallina DL, Barnes C, Phillips LS: **Patient adherence improves glycemic control.** *The Diabetes Educator* 2005, **31**(2):240-250.
25. Hussain Z, Alkharaiji M, Idris I: **Evaluating the effect of inpatient diabetes education on length of stay, readmission rates and mortality rates: a systematic review.** *British Journal of Diabetes* 2020.

- 1  
2  
3  
4  
5  
6  
7  
8  
9  
10  
11  
12  
13  
14  
15  
16  
17  
18  
19  
20  
21  
22  
23  
24  
25  
26  
27  
28  
29  
30  
31  
32  
33  
34  
35  
36  
37  
38  
39  
40  
41  
42  
43  
44  
45  
46  
47  
48  
49  
50  
51  
52  
53  
54  
55  
56  
57  
58  
59  
60
26. Healy SJ, Black D, Harris C, Lorenz A, Dungan KM: **Inpatient diabetes education is associated with less frequent hospital readmission among patients with poor glycemic control.** *Diabetes care* 2013, **36**(10):2960-2967.
  27. Bukhsh A, Khan TM, Nawaz MS, Ahmed HS, Chan KG, Goh B-H: **Association of diabetes knowledge with glycemic control and self-care practices among Pakistani people with type 2 diabetes mellitus.** *Diabetes, Metabolic Syndrome and Obesity: Targets and Therapy* 2019, **12**:1409.
  28. Azami G, Soh KL, Sazlina S-G, Salmiah MS, Aazami S: **Behavioral interventions to improve self-management in Iranian adults with type 2 diabetes: a systematic review and meta-analysis.** *Journal of Diabetes & Metabolic Disorders* 2018, **17**(2):365-380.
  29. Powers MA, Bardsley J, Cypress M, Duker P, Funnell MM, Fischl AH, Maryniuk MD, Siminerio L, Vivian E: **Diabetes self-management education and support in type 2 diabetes: a joint position statement of the American Diabetes Association, the American Association of Diabetes Educators, and the Academy of Nutrition and Dietetics.** *The Diabetes Educator* 2017, **43**(1):40-53.
  30. Powers MA, Bardsley JK, Cypress M, Funnell MM, Harms D, Hess-Fischl A, Hooks B, Isaacs D, Mandel ED, Maryniuk MD: **Diabetes self-management education and support in adults with type 2 diabetes: a consensus report of the American Diabetes Association, the Association of Diabetes Care & Education Specialists, the Academy of Nutrition and Dietetics, the American Academy of Family Physicians, the American Academy of PAs, the American Association of Nurse Practitioners, and the American Pharmacists Association.** *The Science of Diabetes Self-Management and Care* 2021, **47**(1):54-73.
  31. Bos M, Agyemang C: **Prevalence and complications of diabetes mellitus in Northern Africa, a systematic review.** *BMC public health* 2013, **13**(1):387.
  32. Somannavar S, Lanthorn H, Deepa M, Pradeepa R, Rema M, Mohan V: **Increased awareness about diabetes and its complications in a whole city: Effectiveness of the “prevention, awareness, counselling and evaluation”[PACE] Diabetes Project [PACE-6].** *Journal of the Association of Physicians of india* 2008, **56**(7):495-502.
  33. Chrvala CA, Sherr D, Lipman RD: **Diabetes self-management education for adults with type 2 diabetes mellitus: a systematic review of the effect on glycemic control.** *Patient education and counseling* 2016, **99**(6):926-943.
  34. Schapira MM, Swartz S, Ganschow PS, Jacobs EA, Neuner JM, Walker CM, Fletcher KE: **Tailoring educational and behavioral interventions to level of health literacy: a systematic review.** *MDM policy & practice* 2017, **2**(1):2381468317714474.
  35. Murugesan N, Snehalatha C, Shobhana R, Roglic G, Ramachandran A: **Awareness about diabetes and its complications in the general and diabetic population in a city in southern India.** *Diabetes research and clinical practice* 2007, **77**(3):433-437.

- 1  
2  
3 36. Zhao FF, Suhonen R, Koskinen S, Leino-Kilpi H: **Theory-based self-management educational interventions on patients with type 2 diabetes: a systematic review and meta-analysis of randomized controlled trials.** *Journal of advanced nursing* 2017, **73**(4):812-833.
- 4  
5  
6  
7  
8  
9 37. Hildebrand JA, Billimek J, Lee J-A, Sorkin DH, Olshansky EF, Clancy SL, Evangelista LS: **Effect of diabetes self-management education on glycemic control in Latino adults with type 2 diabetes: A systematic review and meta-analysis.** *Patient education and counseling* 2020, **103**(2):266-275.
- 10  
11  
12  
13  
14 38. Aquino JA, Baldoni NR, Flôr CR, Sanches C, Oliveira CDL, Alves GCS, Dal Fabbro AL, Baldoni AO: **Effectiveness of individual strategies for the empowerment of patients with diabetes mellitus: a systematic review with meta-analysis.** *Primary Care Diabetes* 2018, **12**(2):97-110.
- 15  
16  
17  
18  
19 39. Moher D, Shamseer L, Clarke M, Ghersi D, Liberati A, Petticrew M, Shekelle P, Stewart LA: **Preferred reporting items for systematic review and meta-analysis protocols (PRISMA-P) 2015 statement.** *Systematic reviews* 2015, **4**(1):1.
- 20  
21  
22  
23 40. McGowan J, Sampson M, Salzwedel DM, Cogo E, Foerster V, Lefebvre C: **PRESS peer review of electronic search strategies: 2015 guideline statement.** *Journal of clinical epidemiology* 2016, **75**:40-46.
- 24  
25  
26  
27 41. Higgins JP: **Cochrane handbook for systematic reviews of interventions version 5.0. 1. The Cochrane Collaboration.** <http://www.cochrane-handbook.org> 2008.
- 28  
29  
30 42. Higgins J: Green S, editor., eds. **Cochrane Handbook for Systematic Reviews of Interventions. Version 5.1. 0 [updated March 2011]. The Cochrane Collaboration; 2011.** In.; 2016.
- 31  
32  
33  
34 43. Sterne JA, Savović J, Page MJ, Elbers RG, Blencowe NS, Boutron I, Cates CJ, Cheng H-Y, Corbett MS, Eldridge SM: **RoB 2: a revised tool for assessing risk of bias in randomised trials.** *bmj* 2019, **366**.
- 35  
36  
37  
38 44. Guyatt GH, Oxman AD, Kunz R, Vist GE, Falck-Ytter Y, Schünemann HJ: **What is “quality of evidence” and why is it important to clinicians?** *Bmj* 2008, **336**(7651):995-998.
- 39  
40  
41  
42 45. GRADEpro G: **GRADEpro guideline development tool [software].** *McMaster University* 2015.
- 43  
44  
45 46. Borenstein M, Hedges LV, Higgins JP, Rothstein HR: **A basic introduction to fixed-effect and random-effects models for meta-analysis.** *Research synthesis methods* 2010, **1**(2):97-111.
- 46  
47  
48 47. JP H: Thompson SG. Decks 1]. Altman DG. **Measuring inconsistency in meta» analyses.** *BMJ* 2003.
- 49  
50  
51 48. Cohen J: **Statistical power analysis for the behavioral sciences:** Academic press; 2013.
- 52  
53 49. Egger M, Smith GD, Schneider M, Minder C: **Bias in meta-analysis detected by a simple, graphical test. Increase in studies of publication bias coincided with increasing use of meta-analysis.** *British Medical Journal* 1997, **316**:629-634.
- 54  
55  
56  
57  
58  
59  
60

- 1  
2  
3  
4  
5  
6  
7  
8  
9  
10  
11  
12  
13  
14  
15  
16  
17  
18  
19  
20  
21  
22  
23  
24  
25  
26  
27  
28  
29  
30  
31  
32  
33  
34  
35  
36  
37  
38  
39  
40  
41  
42  
43  
44  
45  
46  
47  
48  
49  
50  
51  
52  
53  
54  
55  
56  
57  
58  
59  
60
50. Sterne J, Sutton A: **Ioannidis JP, Terrin N, Jones DR, Lau J, et al. Recommendations for examining and interpreting funnel plot asymmetry in meta-analyses of randomized controlled trials** *BMJ* 2011, **343**:d4002.
51. Cani CG, Lopes LdSG, Queiroz M, Nery M: **Improvement in medication adherence and self-management of diabetes with a clinical pharmacy program: a randomized controlled trial in patients with type 2 diabetes undergoing insulin therapy at a teaching hospital.** *Clinics* 2015, **70**(2):102-106.
52. Grillo MdFF, Neumann CR, Scain SF, Rozeno RF, Beloli L, Perinotto T, Gross JL, Leitão CB: **Diabetes education in primary care: a randomized clinical trial.** *Cadernos de Saude Publica* 2016, **32**:e00097115.
53. Zheng F, Liu S, Liu Y, Deng L: **Effects of an outpatient diabetes self-management education on patients with type 2 diabetes in China: a randomized controlled trial.** *Journal of diabetes research* 2019, **2019**.
54. Jiang XJ, Jiang H, Lu YH, Liu SL, Wang JP, Tang RS, Li MZ: **The effectiveness of a self-efficacy-focused structured education programme on adults with type 2 diabetes: A multicentre randomised controlled trial.** *Journal of clinical nursing* 2019, **28**(17-18):3299-3309.
55. Kong J-X, Zhu L, Wang H-M, Li Y, Guo A-Y, Gao C, Miao Y-Y, Wang T, Lu X-Y, Zhu H-H: **Effectiveness of the Chronic Care Model in Type 2 Diabetes Management in a Community Health Service Center in China: A Group Randomized Experimental Study.** *Journal of Diabetes Research* 2019, **2019**.
56. Hermanns N, Kulzer B, Maier B, Mahr M, Haak T: **The effect of an education programme (MEDIAS 2 ICT) involving intensive insulin treatment for people with type 2 diabetes.** *Patient education and counseling* 2012, **86**(2):226-232.
57. Braun AK, Kubiak T, Kuntsche J, Meier-Höfig M, Müller UA, Feucht I, Zeyfang A: **SGS: a structured treatment and teaching programme for older patients with diabetes mellitus—a prospective randomised controlled multi-centre trial.** *Age and ageing* 2009, **38**(4):390-396.
58. Didarloo A, Shojaeizadeh D, Alizadeh M: **Impact of educational intervention based on interactive approaches on beliefs, behavior, hemoglobin A1c, and quality of life in diabetic women.** *International journal of preventive medicine* 2016, **7**.
59. Askari A, Jeihooni AK, Kashfi SM, Marzban A, Khiyali Z: **The effect of educational program based on belief, attitude, subjective norm, and enabling factors model on changing the metabolic indices in elderly patients with type II diabetes.** *International Journal of Preventive Medicine* 2018, **9**.
60. Azami G SK, Sazlina SG, Salmiah M, Aazami S, Mozafari M, Taghinejad H. **Effect of a nurse-led diabetes self-management education program on glycosylated hemoglobin among adults with type 2 diabetes.** *Journal of diabetes research.* 2018 Jul 8;2018.

- 1  
2  
3  
4  
5  
6  
7  
8  
9  
10  
11  
12  
13  
14  
15  
16  
17  
18  
19  
20  
21  
22  
23  
24  
25  
26  
27  
28  
29  
30  
31  
32  
33  
34  
35  
36  
37  
38  
39  
40  
41  
42  
43  
44  
45  
46  
47  
48  
49  
50  
51  
52  
53  
54  
55  
56  
57  
58  
59  
60
61. Ebrahimi H, Sadeghi M, Amanpour F, Vahedi H: **Evaluation of empowerment model on indicators of metabolic control in patients with type 2 diabetes, a randomized clinical trial study.** *Primary care diabetes* 2016, **10**(2):129-135.
62. Nejhaddadgar N, Darabi F, Rohban A, Solhi M: **The effectiveness of self-management program for people with type 2 diabetes mellitus based on PRECEDE-PROCEDE model.** *Diabetes & Metabolic Syndrome: Clinical Research & Reviews* 2019, **13**(1):440-443.
63. Tan MY MJ, Chee SS, Lee LF, Tan MH. A brief structured education programme enhances self-care practices and improves glycaemic control in Malaysians with poorly controlled diabetes. *Health education research.* 2011 Oct 1;26(5):896-907.
64. Ramadas A CC, Oldenburg B, Hussein Z, Quek KF. Randomised-controlled trial of a web-based dietary intervention for patients with type 2 diabetes: changes in health cognitions and glycemic control. *BMC Public Health.* 2018 Dec 1;18(1):716.
65. Hörnsten Å SH, Lundman B, Sandström H. Improvements in HbA1c remain after 5 years—a follow up of an educational intervention focusing on patients' personal understandings of type 2 diabetes. *Diabetes research and clinical practice.* 2008 Jul 1;81(1):50-5.
66. Adolfsson ET W-EM, Smide B, Wikblad K. Patient education in type 2 diabetes—a randomized controlled 1-year follow-up study. *Diabetes research and clinical practice.* 2007 Jun 1;76(3):341-50.
67. Wichit N, Mnatzaganian G, Courtney M, Schulz P, Johnson M: **Randomized controlled trial of a family-oriented self-management program to improve self-efficacy, glycemic control and quality of life among Thai individuals with Type 2 diabetes.** *Diabetes research and clinical practice* 2017, **123**:37-48.
68. Jayasuriya R PM, Jayawardena R, Kasturiratne A, de Zoysa P, Godamunne P, Gamage S, Wickremasinghe AR. Translational research for diabetes self-management in Sri Lanka: a randomized controlled trial. *Primary care diabetes.* 2015 Oct 1;9(5):338-45.
69. Fan M-H, Huang B-T, Tang Y-C, Han X-H, Dong W-W, Wang L-X: **Effect of individualized diabetes education for type 2 diabetes mellitus: a single-center randomized clinical trial.** *African health sciences* 2016, **16**(4):1157-1162.
70. Association AD: **Standards of medical care in diabetes—2019 abridged for primary care providers.** *Clinical diabetes: a publication of the American Diabetes Association* 2019, **37**(1):11.
71. Stratton IM, Adler AI, Neil HAW, Matthews DR, Manley SE, Cull CA, Hadden D, Turner RC, Holman RR: **Association of glycaemia with macrovascular and microvascular complications of type 2 diabetes (UKPDS 35): prospective observational study.** *Bmj* 2000, **321**(7258):405-412.
72. Association AD: **Implications of the diabetes control and complications trial.** *Diabetes care* 2002, **25**(suppl 1):s25-s27.



- 1  
2  
3  
4  
5  
6  
7  
8  
9  
10  
11  
12  
13  
14  
15  
16  
17  
18  
19  
20  
21  
22  
23  
24  
25  
26  
27  
28  
29  
30  
31  
32  
33  
34  
35  
36  
37  
38  
39  
40  
41  
42  
43  
44  
45  
46  
47  
48  
49  
50  
51  
52  
53  
54  
55  
56  
57  
58  
59  
60
73. Association AD: **4. Foundations of care: education, nutrition, physical activity, smoking cessation, psychosocial care, and immunization.** *Diabetes care* 2015, **38**(Supplement 1):S20-S30.
74. Funnell MM, Anderson RM: **Empowerment and self-management of diabetes.** *Clinical diabetes* 2004, **22**(3):123-127.
75. McEwen MM, Pasvogel A, Gallegos G, Barrera L: **Type 2 diabetes Self-Management social support intervention at the US-Mexico border.** *Public Health Nursing* 2010, **27**(4):310-319.
76. Glazier RH, Bajcar J, Kennie NR, Willson K: **A systematic review of interventions to improve diabetes care in socially disadvantaged populations.** *Diabetes care* 2006, **29**(7):1675-1688.
77. Rickheim PL, Weaver TW, Flader JL, Kendall DM: **Assessment of group versus individual diabetes education: a randomized study.** *Diabetes care* 2002, **25**(2):269-274.
78. Creamer J, Attridge M, Ramsden M, Cannings-John R, Hawthorne K: **Culturally appropriate health education for Type 2 diabetes in ethnic minority groups: an updated Cochrane Review of randomized controlled trials.** *Diabetic Medicine* 2016, **33**(2):169-183.
79. Cheng L, Sit JW, Choi Kc, Chair Sy, Li X, He Xl: **Effectiveness of interactive self-management interventions in individuals with poorly controlled type 2 diabetes: A meta-analysis of randomized controlled trials.** *Worldviews on Evidence-Based Nursing* 2017, **14**(1):65-73.
80. Tsay S-L, Hung L-O: **Empowerment of patients with end-stage renal disease—a randomized controlled trial.** *International Journal of nursing studies* 2004, **41**(1):59-65.

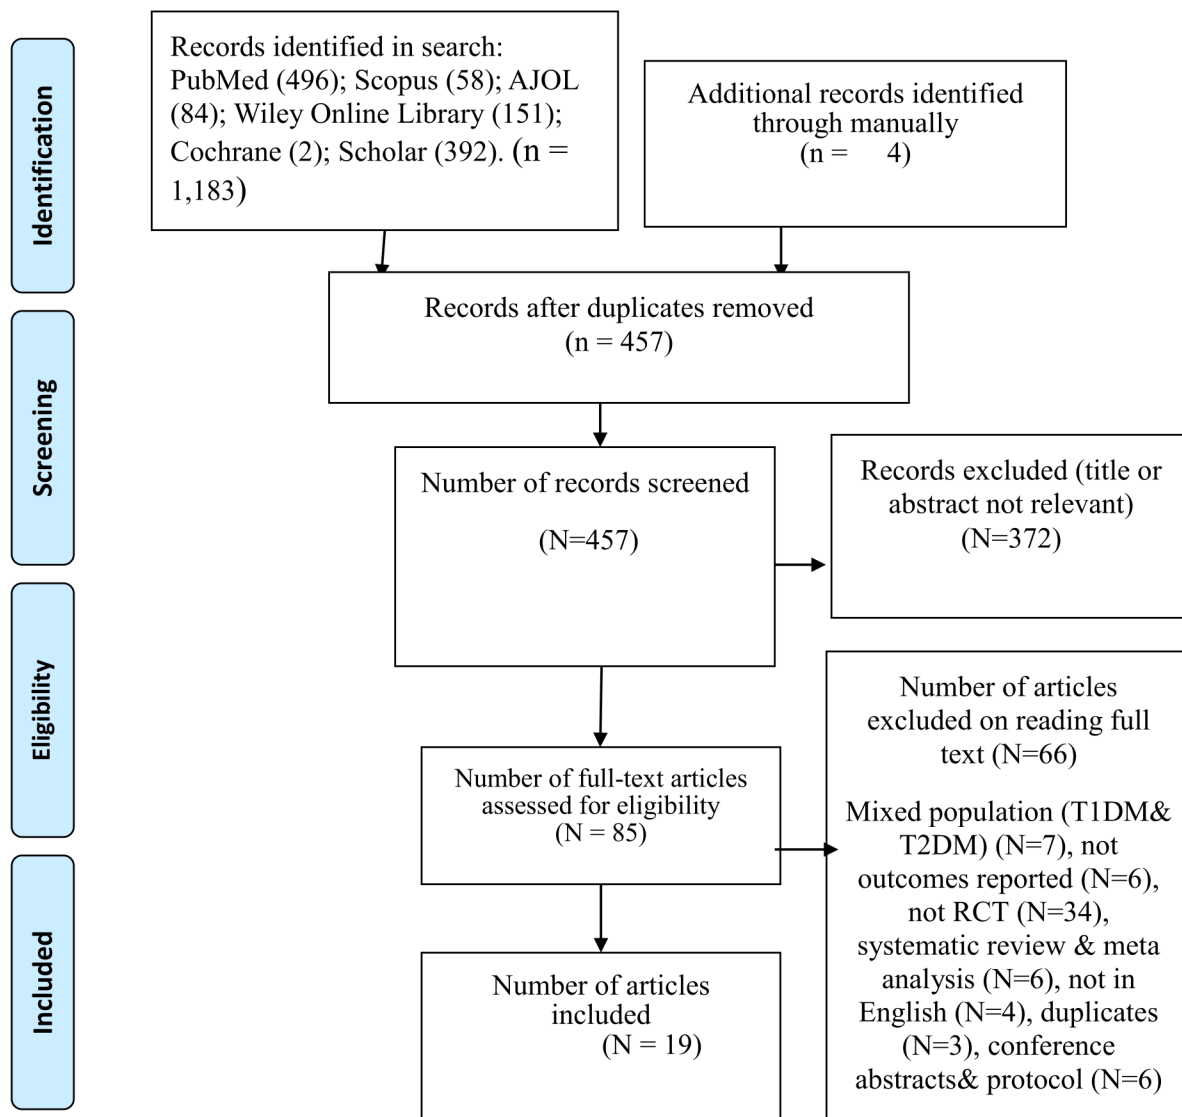

Figure 1. PRISMA flow chart for selection of studies

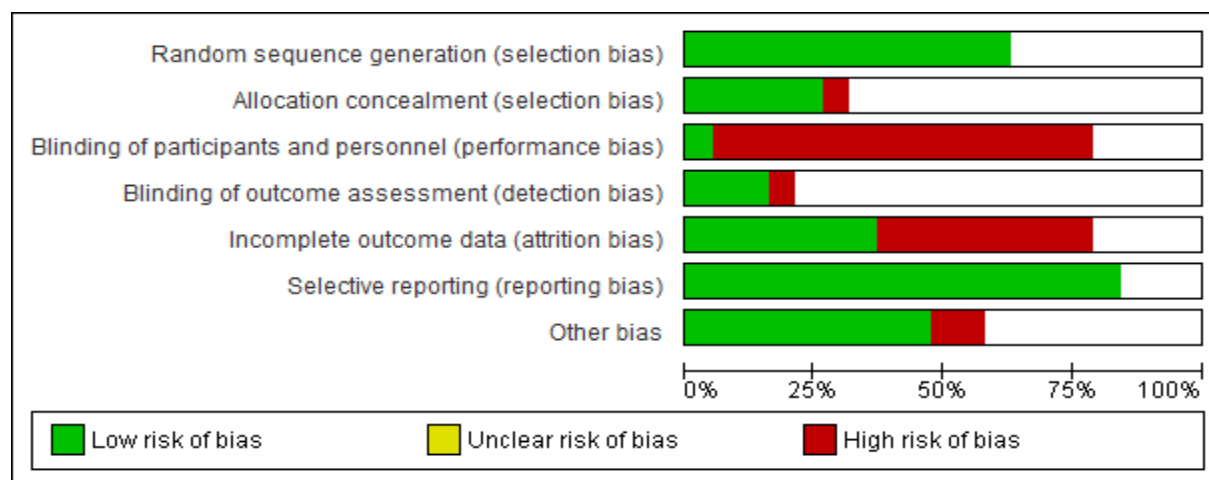

Figure 2. Risk of bias graph: review authors' judgments about each risk of bias item presented as percentages across all included studies.

|                             | Random sequence generation (selection bias) | Allocation concealment (selection bias) | Blinding of participants and personnel (performance bias) | Blinding of outcome assessment (detection bias) | Incomplete outcome data (attrition bias) | Selective reporting (reporting bias) | Other bias |
|-----------------------------|---------------------------------------------|-----------------------------------------|-----------------------------------------------------------|-------------------------------------------------|------------------------------------------|--------------------------------------|------------|
| Adolfsson ET W-EM , 2017    | +                                           |                                         | -                                                         |                                                 | -                                        |                                      | +          |
| Askari A, 2018              |                                             | -                                       | -                                                         |                                                 |                                          | +                                    |            |
| Azami G SK et al, 2018      | +                                           | +                                       | -                                                         |                                                 | +                                        | +                                    | +          |
| Braun AK et al, 2009        | +                                           |                                         | -                                                         |                                                 | -                                        | +                                    |            |
| Cani CG et al, 2015         |                                             |                                         | -                                                         |                                                 | +                                        | +                                    |            |
| Didarloo A , 2016           |                                             | +                                       | -                                                         |                                                 | +                                        | +                                    | -          |
| Ebrahimi H, 2016            | +                                           |                                         | +                                                         | +                                               | -                                        | +                                    |            |
| Grillo MdFF et al, 2016     | +                                           |                                         | -                                                         | +                                               | +                                        |                                      | +          |
| Hermanns N , 2012           | +                                           |                                         |                                                           |                                                 | -                                        | +                                    | +          |
| Hörnsten Å SH , 2008        |                                             |                                         | -                                                         |                                                 |                                          | +                                    | -          |
| Jayasuriya R PM et al, 2015 | +                                           |                                         | -                                                         |                                                 | -                                        | +                                    |            |
| Jiang XJ et al, 2019        | +                                           | +                                       |                                                           |                                                 | +                                        | +                                    | +          |
| Kong J-X et al, 2019        |                                             |                                         |                                                           |                                                 | -                                        | +                                    |            |
| Min-Hua Fan et al, 2016     |                                             |                                         | -                                                         |                                                 | +                                        | +                                    | +          |
| Nejhaddadgar N, 2019        |                                             |                                         |                                                           |                                                 |                                          | +                                    |            |
| Ramadas A CC, 2018          | +                                           |                                         | -                                                         | -                                               | -                                        |                                      | +          |
| Tan MY MJ et al, 2011       | +                                           |                                         | -                                                         |                                                 | -                                        | +                                    |            |
| Wichit N et al, 2017        | +                                           | +                                       | -                                                         | +                                               | +                                        | +                                    | +          |
| Zheng F , 2019              | +                                           | +                                       | -                                                         |                                                 |                                          | +                                    | +          |

Figure 3. Risk of bias summary: review authors' judgments about each risk of bias item for each included study.

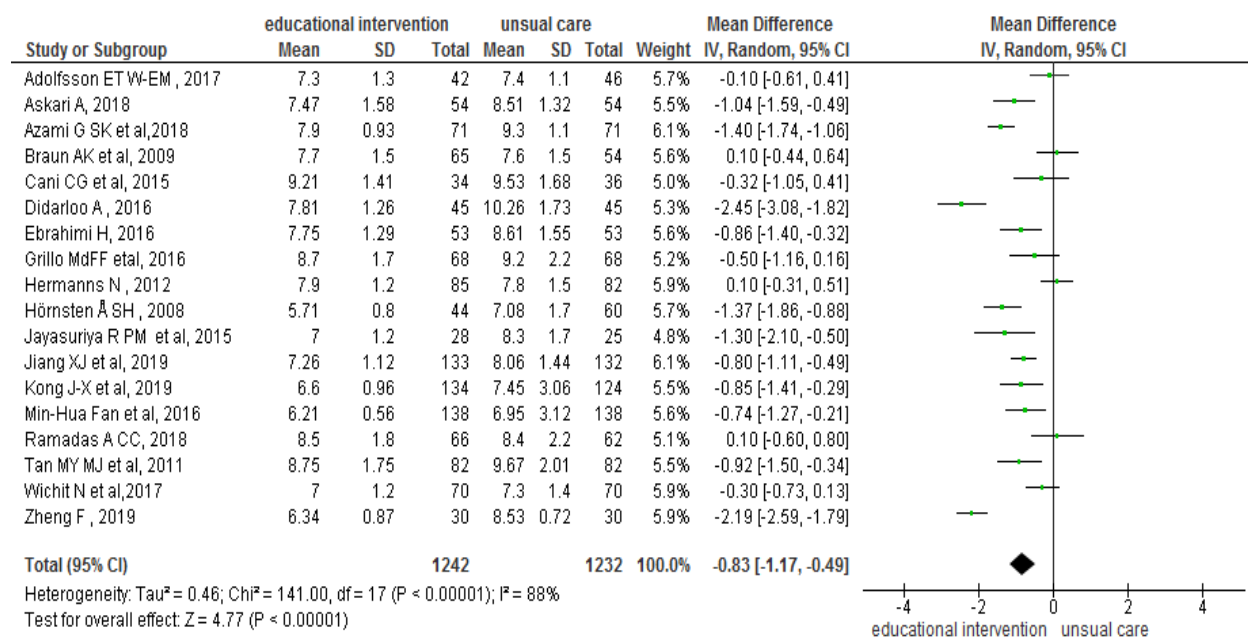

Figure 4. The pooled effect of education interventions on HbA1c levels in patients with T2DM

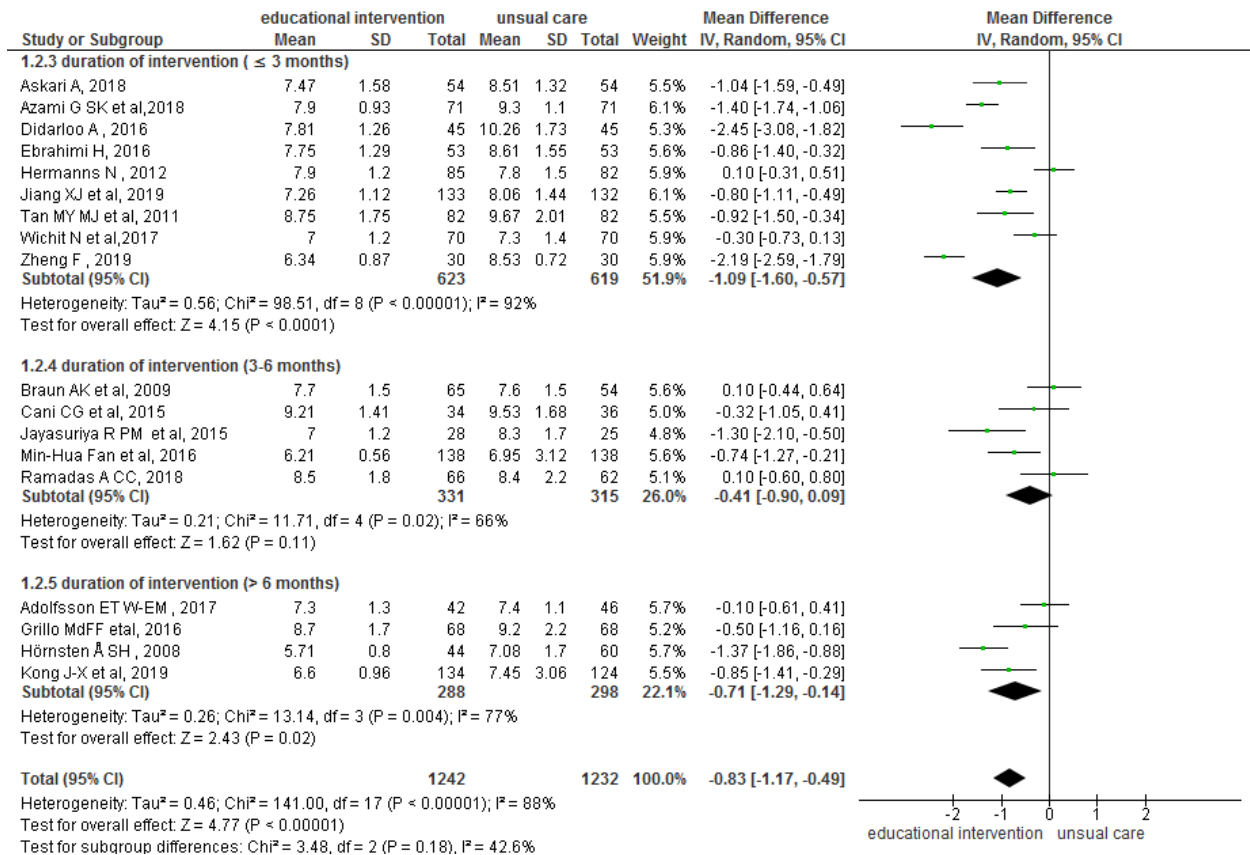

Figure 5. Subgroup analysis based on the duration of the intervention

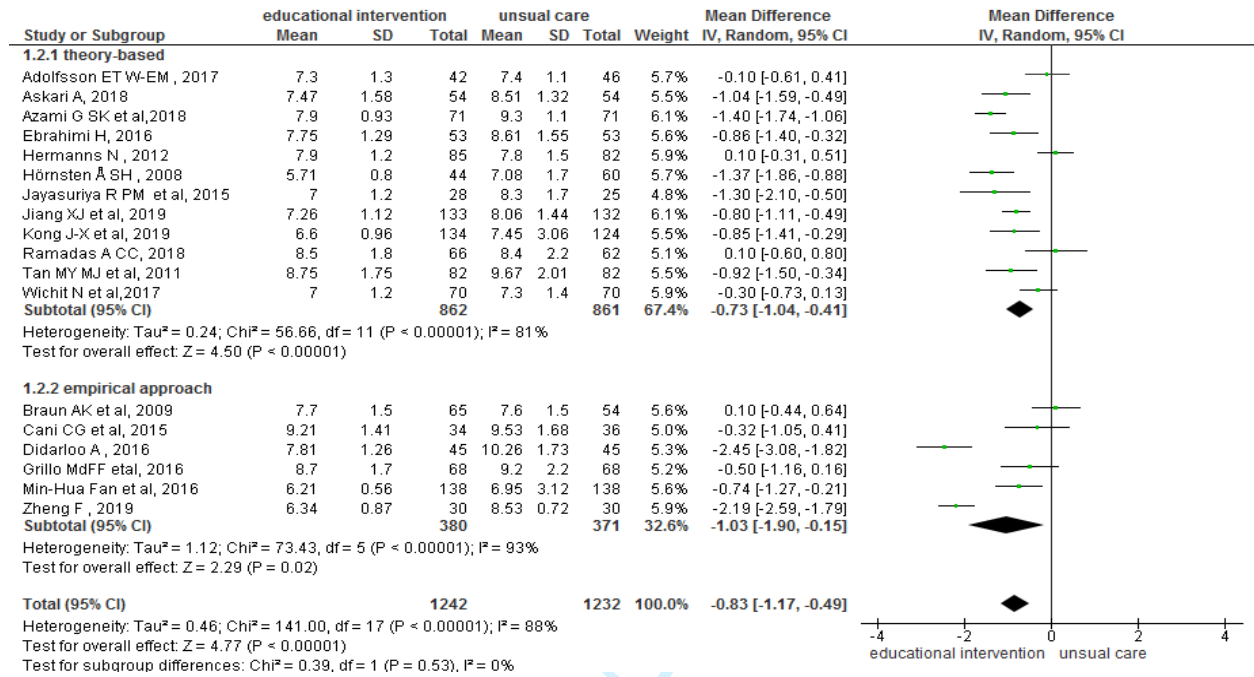

Figure 6. Subgroup analysis based on intervention design

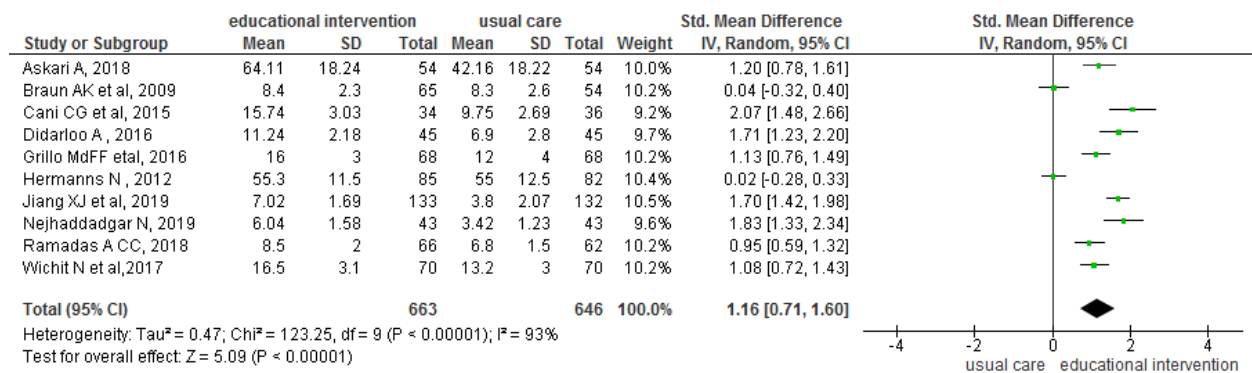

Figure 7. The pooled effect of education interventions on disease knowledge in patients with Type 2 Diabetes.



1  
2  
3  
4  
5  
6  
7  
8  
9  
10  
11  
12  
13  
14  
15  
16  
17  
18  
19  
20  
21  
22  
23  
24  
25  
26  
27  
28  
29  
30  
31  
32  
33  
34  
35  
36  
37  
38  
39  
40  
41  
42  
43  
44  
45  
46  
47  
48  
49  
50  
51  
52  
53  
54  
55  
56  
57  
58  
59  
60

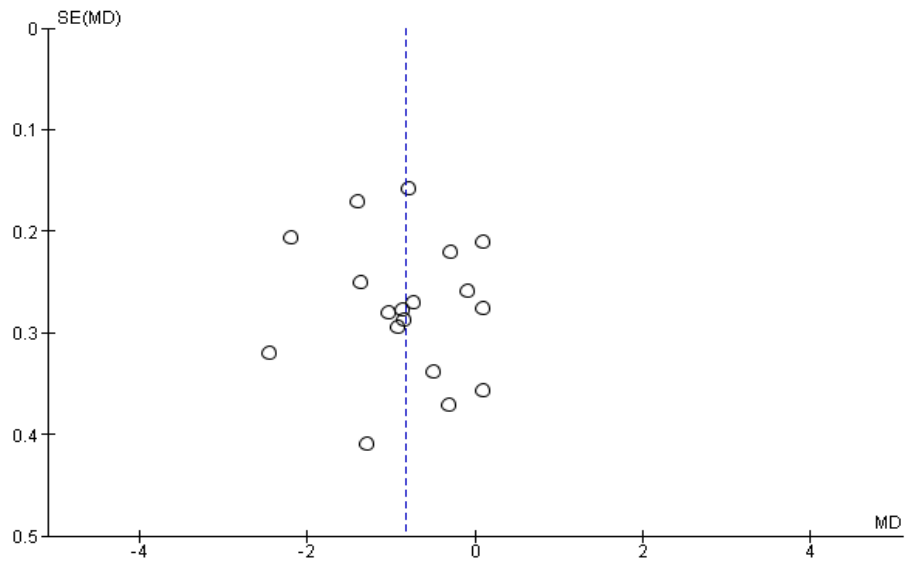

Figure 8. Funnel plot for HbA1c results.

review only

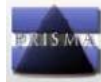

# PRISMA 2009 Checklist

| Section/topic                      | #  | Checklist item                                                                                                                                                                                                                                                                                              | Reported on page # |
|------------------------------------|----|-------------------------------------------------------------------------------------------------------------------------------------------------------------------------------------------------------------------------------------------------------------------------------------------------------------|--------------------|
| <b>TITLE</b>                       |    |                                                                                                                                                                                                                                                                                                             |                    |
| Title                              | 1  | Identify the report as a systematic review, meta-analysis, or both.                                                                                                                                                                                                                                         | 1                  |
| <b>ABSTRACT</b>                    |    |                                                                                                                                                                                                                                                                                                             |                    |
| Structured summary                 | 2  | Provide a structured summary including, as applicable: background; objectives; data sources; study eligibility criteria, participants, and interventions; study appraisal and synthesis methods; results; limitations; conclusions and implications of key findings; systematic review registration number. | 2                  |
| <b>INTRODUCTION</b>                |    |                                                                                                                                                                                                                                                                                                             |                    |
| Rationale                          | 3  | Describe the rationale for the review in the context of what is already known.                                                                                                                                                                                                                              | 3-4                |
| Objectives                         | 4  | Provide an explicit statement of questions being addressed with reference to participants, interventions, comparisons, outcomes, and study design (PICOS).                                                                                                                                                  | 4                  |
| <b>METHODS</b>                     |    |                                                                                                                                                                                                                                                                                                             |                    |
| Protocol and registration          | 5  | Indicate if a review protocol exists, if and where it can be accessed (e.g., Web address), and, if available, provide registration information including registration number.                                                                                                                               | CRD42020205838     |
| Eligibility criteria               | 6  | Specify study characteristics (e.g., PICOS, length of follow-up) and report characteristics (e.g., years considered, language, publication status) used as criteria for eligibility, giving rationale.                                                                                                      | 5-6                |
| Information sources                | 7  | Describe all information sources (e.g., databases with dates of coverage, contact with study authors to identify additional studies) in the search and date last searched.                                                                                                                                  | 5                  |
| Search                             | 8  | Present full electronic search strategy for at least one database, including any limits used, such that it could be repeated.                                                                                                                                                                               | 5                  |
| Study selection                    | 9  | State the process for selecting studies (i.e., screening, eligibility, included in systematic review, and, if applicable, included in the meta-analysis).                                                                                                                                                   | 6                  |
| Data collection process            | 10 | Describe method of data extraction from reports (e.g., piloted forms, independently, in duplicate) and any processes for obtaining and confirming data from investigators.                                                                                                                                  | 7                  |
| Data items                         | 11 | List and define all variables for which data were sought (e.g., PICOS, funding sources) and any assumptions and simplifications made.                                                                                                                                                                       | 5                  |
| Risk of bias in individual studies | 12 | Describe methods used for assessing risk of bias of individual studies (including specification of whether this was done at the study or outcome level), and how this information is to be used in any data synthesis.                                                                                      | 7                  |
| Summary measures                   | 13 | State the principal summary measures (e.g., risk ratio, difference in means).                                                                                                                                                                                                                               | 8                  |
| Synthesis of results               | 14 | Describe the methods of handling data and combining results of studies, if done, including measures of consistency (e.g., $I^2$ ) for each meta-analysis                                                                                                                                                    | 8                  |



# PRISMA 2009 Checklist

Page 1 of 2

| Section/topic                 | #  | Checklist item                                                                                                                                                                                           | Reported on page # |
|-------------------------------|----|----------------------------------------------------------------------------------------------------------------------------------------------------------------------------------------------------------|--------------------|
| Risk of bias across studies   | 15 | Specify any assessment of risk of bias that may affect the cumulative evidence (e.g., publication bias, selective reporting within studies).                                                             | 8                  |
| Additional analyses           | 16 | Describe methods of additional analyses (e.g., sensitivity or subgroup analyses, meta-regression), if done, indicating which were pre-specified.                                                         | 8                  |
| <b>RESULTS</b>                |    |                                                                                                                                                                                                          |                    |
| Study selection               | 17 | Give numbers of studies screened, assessed for eligibility, and included in the review, with reasons for exclusions at each stage, ideally with a flow diagram.                                          | 8                  |
| Study characteristics         | 18 | For each study, present characteristics for which data were extracted (e.g., study size, PICOS, follow-up period) and provide the citations.                                                             | 9-13               |
| Risk of bias within studies   | 19 | Present data on risk of bias of each study and, if available, any outcome level assessment (see item 12).                                                                                                | 14                 |
| Results of individual studies | 20 | For all outcomes considered (benefits or harms), present, for each study: (a) simple summary data for each intervention group (b) effect estimates and confidence intervals, ideally with a forest plot. | 14                 |
| Synthesis of results          | 21 | Present results of each meta-analysis done, including confidence intervals and measures of consistency.                                                                                                  | 14-15              |
| Risk of bias across studies   | 22 | Present results of any assessment of risk of bias across studies (see Item 15).                                                                                                                          | 15                 |
| Additional analysis           | 23 | Give results of additional analyses, if done (e.g., sensitivity or subgroup analyses, meta-regression [see Item 16]).                                                                                    | 14-15              |
| <b>DISCUSSION</b>             |    |                                                                                                                                                                                                          |                    |
| Summary of evidence           | 24 | Summarize the main findings including the strength of evidence for each main outcome; consider their relevance to key groups (e.g., healthcare providers, users, and policy makers).                     | 18-19              |
| Limitations                   | 25 | Discuss limitations at study and outcome level (e.g., risk of bias), and at review-level (e.g., incomplete retrieval of identified research, reporting bias).                                            | 20                 |
| Conclusions                   | 26 | Provide a general interpretation of the results in the context of other evidence, and implications for future research.                                                                                  | 20                 |
| <b>FUNDING</b>                |    |                                                                                                                                                                                                          |                    |
| Funding                       | 27 | Describe sources of funding for the systematic review and other support (e.g., supply of data); role of funders for the systematic review.                                                               | NA                 |

PRISMA checklist the paper entitled the effect of educational interventions on knowledge and glycemic control in patients with type 2 diabetes mellitus: a systematic review and meta-analysis of randomized controlled trials

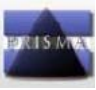

# PRISMA 2009 Checklist

- 1
- 2
- 3
- 4
- 5
- 6
- 7
- 8
- 9
- 10
- 11
- 12
- 13
- 14
- 15
- 16
- 17
- 18
- 19
- 20
- 21
- 22
- 23
- 24
- 25
- 26
- 27
- 28
- 29
- 30
- 31
- 32
- 33
- 34
- 35
- 36
- 37
- 38
- 39
- 40
- 41
- 42
- 43
- 44
- 45
- 46
- 47

For more information, visit: [www.prisma-statement.org](http://www.prisma-statement.org).

Page 2 of 2

For peer review only
